# Supplementary material for: Epidemiological scenario of dengue in the state of Manipur during the last 3 years
Source: PeerJ. 2020 Feb 3;8:e8518. doi: 10.7717/peerj.8518 (PMC7003685; doi:10.7717/peerj.8518)
Supplement: Data S1 [file peerj-08-8518-s001.xlsx]

## Sheet: 2016
age	female	male	rural	urban	positive	equivocal	negative	District	Test	Month
32	1	0	1	0	0	0	1	imphal west	NS1Ag	september
38	0	1	1	0	1	0	0	tamenglong	NS1Ag	september
58	0	1	0	1	0	0	1	imphal west	NS1Ag	september
22	1	0	0	1	1	0	0	imphal west	NS1Ag	september
23	0	1	0	1	0	0	1	imphal west	NS1Ag	september
38	0	1	0	1	0	0	1	imphal east	NS1Ag	september
31	0	1	0	1	0	0	1	imphal west	NS1Ag	october
40	1	0	0	1	1	0	0	imphal west	NS1Ag	october
42	1	0	0	1	1	0	0	imphal west	NS1Ag	october
42	1	0	0	1	1	0	0	imphal west	NS1Ag	october
45	0	1	0	1	0	0	1	imphal east	NS1Ag	october
55	1	0	0	1	0	0	1	imphal west	NS1Ag	october
52	1	0	0	1	0	0	1	imphal west	NS1Ag	october
52	1	0	0	1	0	0	1	imphal west	NS1Ag	october
19	1	0	0	1	0	0	1	imphal west	NS1Ag	october
16	1	0	0	1	0	0	1	imphal west	NS1Ag	october
40	1	0	0	1	0	0	1	imphal west	NS1Ag	october
21	0	1	1	0	0	0	1	thoubal	NS1Ag	october
50	1	0	0	1	1	0	0	imphal west	NS1Ag	october
17	0	1	0	1	1	0	0	imphal west	NS1Ag	october
47	1	0	0	1	1	0	0	imphal west	NS1Ag	october
48	0	1	0	1	1	0	0	imphal west	NS1Ag	october
37	1	0	0	1	1	0	0	imphal west	NS1Ag	october
51	0	1	0	1	1	0	0	imphal west	NS1Ag	october
18	1	0	0	1	1	0	0	imphal west	NS1Ag	october
13	0	1	0	1	1	0	0	imphal west	NS1Ag	october
35	1	0	0	1	1	0	0	imphal west	NS1Ag	october
45	0	1	0	1	1	0	0	imphal west	NS1Ag	october
50	1	0	0	1	1	0	0	imphal west	NS1Ag	october
23	0	1	1	0	1	0	0	thoubal	NS1Ag	october
19	1	0	0	1	0	0	1	imphal west	NS1Ag	october
10	0	1	0	1	0	0	1	imphal west	NS1Ag	october
7	1	0	0	1	0	0	1	imphal west	NS1Ag	october
44	0	1	0	1	0	0	1	imphal west	NS1Ag	october
42	0	1	0	1	0	0	1	imphal west	NS1Ag	october
8	1	0	1	0	0	0	1	thoubal	NS1Ag	october
18	0	1	0	1	0	0	1	imphal east	NS1Ag	october
21	0	1	0	1	0	0	1	imphal west	NS1Ag	october
37	0	1	1	0	0	0	1	imphal east	NS1Ag	october
67	0	1	0	1	0	0	1	imphal west	NS1Ag	october
8	0	1	0	1	0	0	1	imphal west	NS1Ag	october
16	0	1	0	1	0	0	1	imphal west	NS1Ag	october
13	0	1	0	1	0	0	1	imphal west	NS1Ag	october
28	1	0	0	1	0	0	1	imphal west	NS1Ag	october
70	1	0	0	1	1	0	0	imphal west	NS1Ag	october
63	1	0	0	1	1	0	0	imphal west	NS1Ag	october
18	0	1	1	0	1	0	0	tamenglong	NS1Ag	october
6	1	0	0	1	1	0	0	imphal west	NS1Ag	october
22	1	0	0	1	1	0	0	imphal west	NS1Ag	october
51	0	1	0	1	0	1	0	imphal west	IgM	october
26	1	0	0	1	0	1	0	imphal west	IgM	october
7	0	1	0	1	0	1	0	imphal west	IgM	october
43	0	1	0	1	0	0	1	imphal west	IgM	october
68	1	0	0	1	0	0	1	imphal west	IgM	october
46	0	1	0	1	0	0	1	imphal west	IgM	october
33	0	1	1	0	0	0	1	imphal east	IgM	october
29	1	0	0	1	0	0	1	imphal west	IgM	october
32	0	1	1	0	0	0	1	imphal west	IgM	october
24	0	1	0	1	0	0	1	imphal west	IgM	october
23	0	1	0	1	0	0	1	imphal west	IgM	october
23	0	1	0	1	0	0	1	imphal west	IgM	october
17	1	0	0	1	0	0	1	imphal west	IgM	october
24	1	0	1	0	0	0	1	bishnupur	IgM	october
32	1	0	0	1	0	0	1	imphal west	IgM	october
31	1	0	0	1	0	0	1	imphal west	IgM	october
55	1	0	0	1	0	0	1	imphal west	IgM	october
38	1	0	0	1	0	0	1	imphal west	IgM	october
32	0	1	0	1	0	0	1	imphal west	IgM	october
32	0	1	1	0	0	0	1	imphal west	IgM	october
12	1	0	1	0	0	0	1	imphal east	IgM	october
2.5	1	0	0	1	0	0	1	imphal west	IgM	october
48	1	0	0	1	0	0	1	imphal west	IgM	october
11	0	1	1	0	1	0	0	thoubal	IgM	october
9.1	1	0	0	1	1	0	0	imphal west	IgM	october
31	1	0	0	1	0	1	0	Imphal West	IgM	october
24	1	0	0	1	0	1	0	Imphal West	IgM	october
29	0	1	1	0	0	1	0	Imphal West	IgM	october
6.5	0	1	0	1	0	1	0	Imphal West	IgM	october
15	0	1	1	0	0	1	0	Senapati	IgM	october
28	0	1	0	1	0	0	1	Imphal West	IgM	october
35	1	0	0	1	0	0	1	Imphal East	IgM	october
33	0	1	1	0	0	0	1	Imphal West	IgM	october
19	0	1	0	1	0	0	1	Imphal West	IgM	october
28	0	1	0	1	0	0	1	Imphal West	IgM	october
65	1	0	0	1	1	0	0	Imphal West	IgM	october
36	1	0	0	1	1	0	0	Imphal West	IgM	october
6	0	1	0	1	1	0	0	Imphal East	IgM	october
21	0	1	1	0	1	0	0	Thoubal	IgM	october
75	0	1	0	1	0	1	0	Imphal West	NS1Ag	october
33	0	1	1	0	0	1	0	bishnupur	NS1Ag	october
38	1	0	0	1	0	0	1	Imphal West	NS1Ag	october
30	0	1	0	1	0	0	1	Imphal West	NS1Ag	october
53	1	0	1	0	0	0	1	Imphal West	NS1Ag	october
12	0	1	1	0	0	0	1	Bishnupur	NS1Ag	october
6	0	1	0	1	0	0	1	Imphal West	NS1Ag	october
22	0	1	0	1	0	0	1	Imphal West	NS1Ag	october
32	1	0	0	1	1	0	0	Imphal West	NS1Ag	october
47	0	1	0	1	1	0	0	Imphal West	NS1Ag	october
27	0	1	1	0	1	0	0	Imphal East	NS1Ag	october
28	0	1	1	0	0	1	0	Arunachal Pradesh	IgM	october
36	1	0	1	0	0	1	0	Imphal East	IgM	october
13	1	0	1	0	0	1	0	Imphal East	IgM	october
3	1	0	1	0	0	1	0	Senapati	IgM	october
57	0	1	1	0	0	0	1	Imphal West	IgM	october
41	0	1	1	0	0	0	1	Thoubal	IgM	october
2	0	1	0	1	0	0	1	Imphal West	IgM	october
52	0	1	0	1	0	0	1	Imphal West	IgM	october
67	0	1	1	0	0	0	1	Thoubal	IgM	october
47	0	1	0	1	0	0	1	Imphal West	IgM	october
45	1	0	0	1	1	0	0	Imphal West	IgM	october
15	0	1	0	1	1	0	0	Imphal West	IgM	october
20	0	1	1	0	1	0	0	Imphal East	IgM	october
23	1	0	1	0	0	1	0	Imphal East	NS1Ag	october
20	1	0	1	0	0	1	0	Imphal East	NS1Ag	october
20	0	1	1	0	0	0	1	Ukhrul	NS1Ag	october
7	0	1	0	1	0	0	1	Imphal West	NS1Ag	october
17	0	1	1	0	0	0	1	Imphal West	NS1Ag	october
15	1	0	1	0	0	0	1	Imphal East	NS1Ag	october
7	1	0	0	1	0	0	1	Imphal East	NS1Ag	october
33	0	1	0	1	1	0	0	Imphal West	NS1Ag	october
13	1	0	0	1	1	0	0	Imphal West	NS1Ag	october
54	0	1	1	0	1	0	0	Imphal West	NS1Ag	october
25	1	0	1	0	1	0	0	Tamenglong	NS1Ag	october
3	1	0	1	0	0	1	0	Senapati	NS1Ag	october
75	0	1	0	1	0	1	0	Imphal West	NS1Ag	october
38	1	0	1	0	0	1	0	Bishnupur	NS1Ag	october
9.1	1	0	0	1	0	1	0	Imphal West	NS1Ag	october
17	0	1	1	0	0	1	0	imphal east	NS1Ag	october
4	0	1	1	0	0	1	0	imphal west	NS1Ag	october
30	0	1	1	0	0	1	0	Imphal West	NS1Ag	october
17	0	1	0	1	0	1	0	Imphal East	NS1Ag	october
50	1	0	1	0	0	1	0	Imphal East	NS1Ag	october
43	0	1	1	0	0	0	1	Imphal East	NS1Ag	october
35	0	1	1	0	0	0	1	Imphal East	NS1Ag	october
19	0	1	0	1	0	0	1	Imphal East	NS1Ag	october
36	0	1	0	1	0	1	0	Imphal West	IgM	october
8	0	1	1	0	0	1	0	Imphal East	IgM	october
30	1	0	1	0	0	0	1	Imphal East	IgM	october
31	0	1	1	0	0	0	1	Imphal East	IgM	october
18	0	1	1	0	0	0	1	Thoubal	IgM	october
18	0	1	1	0	0	0	1	Imphal East	IgM	october
29	0	1	1	0	0	0	1	Imphal East	IgM	october
38	0	1	1	0	0	0	1	Imphal East	IgM	october
40	1	0	1	0	0	0	1	Imphal East	IgM	october
34	0	1	1	0	0	0	1	Imphal West	IgM	october
35	0	1	1	0	0	0	1	Churachandpur	IgM	october
29	0	1	1	0	0	0	1	Imphal West	IgM	october
40	0	1	1	0	0	0	1	Imphal East	IgM	october
45	0	1	1	0	0	0	1	Senapati	IgM	october
37	0	1	1	0	0	1	0	Imphal East	IgM	october
51	1	0	1	0	0	1	0	Thoubal	IgM	october
37	0	1	1	0	0	1	0	Thoubal	IgM	october
22	0	1	1	0	0	1	0	Thoubal	IgM	october
25	1	0	1	0	0	0	1	Imphal East	IgM	october
43	0	1	1	0	0	0	1	Senapati	IgM	october
29	1	0	0	1	0	0	1	Imphal West	IgM	october
14	0	1	0	1	0	0	1	Imphal East	IgM	october
14	0	1	1	0	0	0	1	Bishnupur	IgM	october
13	1	0	1	0	0	0	1	Imphal East	IgM	october
36	0	1	0	1	1	0	0	Imphal West	IgM	october
42	0	1	0	1	0	0	1	Imphal West	IgM	november
26	0	1	1	0	0	0	1	Imphal East	IgM	november
40	0	1	1	0	0	0	1	Imphal East	IgM	november
17	0	1	1	0	0	0	1	senpati	IgM	november
14	0	1	1	0	0	0	1	tamenglong	IgM	november
22	0	1	1	0	1	0	0	imphal east	IgM	november
34	1	0	0	1	0	1	0	imphal east	IgM	november
41	0	1	0	1	0	1	0	Imphal West	IgM	november
55	1	0	1	0	0	0	1	bishnupur	IgM	november
20	0	1	1	0	0	0	1	Thoubal	IgM	november
29	0	1	1	0	0	0	1	Thoubal	IgM	november
30	1	0	1	0	0	0	1	imphal east	IgM	november
22	1	0	0	1	0	0	1	Imphal West	IgM	november
26	1	0	1	0	0	0	1	Thoubal	IgM	november
44	1	0	1	0	0	0	1	bishnupur	IgM	november
58	0	1	1	0	0	0	1	imphal east	IgM	november
67	0	1	0	1	0	0	1	imphal west	IgM	november
33	1	0	0	1	0	0	1	imphal west	IgM	november
58	1	0	0	1	1	0	0	imphal west	IgM	november
34	0	1	0	1	1	0	0	imphal west	IgM	november
45	0	1	1	0	0	1	0	imphal west	IgM	november
35	1	0	0	1	0	0	1	imphal west	IgM	november
66	1	0	0	1	0	0	1	imphal west	IgM	november
7	0	1	0	1	0	0	1	imphal west	IgM	november
11	0	1	0	1	0	0	1	imphal west	IgM	november
25	0	1	1	0	0	0	1	imphal east	IgM	november
36	0	1	1	0	0	0	1	imphal east	IgM	november
63	1	0	1	0	0	0	1	imphal east	IgM	november
20	0	1	0	1	0	0	1	Imphal West	IgM	november
38	0	1	1	0	0	0	1	imphal east	IgM	november
14	1	0	1	0	0	0	1	Thoubal	IgM	november
9	0	1	1	0	0	1	0	Chnadel	IgM	november
65	0	1	1	0	0	1	0	Imphal East	IgM	november
32	0	1	1	0	0	0	1	Imphal East	IgM	november
50	1	0	0	1	0	0	1	Imphal West	IgM	november
29	0	1	1	0	0	0	1	Imphal East	IgM	november
55	1	0	1	0	0	0	1	Imphal West	IgM	november
65		1	1	0	0	0	1	Imphal West	IgM	november
6	0	1	1	0	0	0	1	Chnadel	IgM	november
60	1	0	1	0	0	0	1	Ukhrul	IgM	november
65	1	0	1	0	0	0	1	Imphal East	IgM	november
27	1	0	1	0	0	0	1	Imphal East	IgM	november
20	0	1	1	0	0	0	1	Bishnupur	IgM	november
29	1	0	1	0	0	0	1	Thoubal	IgM	november
0.4	0	1	0	1	0	0	1	Imphal West	IgM	november
12	0	1	0	1	1	0	0	Imphal West	IgM	november
27	0	1	1	0	1	0	0	Churachandpur	IgM	november
29	1	0	1	0	1	0	0	Imphal West	IgM	november
30	0	1	1	0	0	1	0	Thoubal	IgM	november
4	0	1	1	0	0	1	0	imphal west	IgM	november
47	1	0	1	0	0	0	1	imphal east	IgM	november
22	0	1	1	0	0	0	1	Thoubal	IgM	november
11	0	1	1	0	0	0	1	Thoubal	IgM	november
49	0	1	0	1	0	0	1	imphal west	IgM	november
40	1	0	1	0	0	1	0	imphal east	IgM	november
62	0	1	1	0	0	1	0	imphal east	IgM	november
49	1	0	0	1	0	0	1	imphal west	IgM	november
22	0	1	1	0	0	0	1	imphal east	IgM	november
18	1	0	1	0	0	0	1	senapati	IgM	november
54	1	0	1	0	0	0	1	imphal east	NS1Ag	november
62	0	1	0	1	1	0	0	imphal east	NS1Ag	november
21	0	1	1	0	1	0	0	imphal west	NS1Ag	november
50	1	0	1	0	1	0	0	imphal west	NS1Ag	november
39	0	1	0	1	0	1	0	imphal west	IgM	november
22	0	1	1	0	0	1	0	imphal east	IgM	november
38	0	1	1	0	0	1	0	Bishnupur	IgM	november
26	0	1	1	0	0	1	0	senapati	IgM	november
16	0	1	1	0	0	0	1	imphal east	IgM	november
65	1	0	0	1	0	0	1	imphal west	IgM	november
17	1	0	1	0	1	0	0	ukhrul	NS1Ag	november
14	0	1	1	0	0	0	1	imphal east	NS1Ag	november
22	0	1	1	0	1	0	0	tamenglong	NS1Ag	november
20	1	0	1	0	1	0	0	Imphal West	NS1Ag	november
48	0	1	1	0	0	1	0	imphal west	IgM	november
70	0	1	1	0	0	1	0	Bishnupur	IgM	november
45	1	0	0	1	0	1	0	imphal west	IgM	november
23	0	1	1	0	0	0	1	Thoubal	IgM	november
40	0	1	1	0	0	0	1	senapati	IgM	november
35	0	1	0	1	0	1	0	imphal west	IgM	december
14	1	0	1	0	0	1	0	tamenglong	IgM	december
28	1	0	1	0	0	0	1	Bishnupur	IgM	december
39	0	1	0	1	0	0	1	Imphal West	IgM	december
33	0	1	1	0	1	0	0	Imphal West	IgM	december
35	0	1	1	0	1	0	0	imphal east	IgM	december
30	0	1	0	1	0	1	0	imphal east	IgM	december
35	0	1	0	1	0	0	1	imphal east	IgM	december
66	1	0	0	1	0	0	1	Imphal West	IgM	december
30	1	0	1	0	0	0	1	Churachandpur	IgM	december
55	0	1	1	0	0	0	1	Bishnupur	IgM	december
26	0	1	1	0	0	0	1	Thoubal	IgM	december
57	0	1	1	0	0	0	1	Thoubal	IgM	december
40	0	1	1	0	0	0	1	tamenglong	IgM	december
	99	153	130	122	53	50	149

## Sheet: 2017
age	female	male	rural	urban	positive	equivocal	negative	District	Test	Month
17	1	0	1	0	0	0	1	Bishnupur	IgM	sep
17	1	0	1	0	0	1	0	Bishnupur	IgM	sep
40	1	0	1	0	0	0	1	Bishnupur	IgM	sep
42	1	0	1	0	0	0	1	Bishnupur	IgM	sep
63	0	1	1	0	0	0	1	Bishnupur	IgM	sep
78	0	1	1	0	0	0	1	Bishnupur	IgM	sep
86	0	1	1	0	0	0	1	Bishnupur	IgM	sep
17	0	1	1	0	0	1	0	Bishnupur	IgM	oct
22	0	1	1	0	0	1	0	Bishnupur	IgM	oct
22	1	0	1	0	1	0	0	Bishnupur	NS1	oct
24	0	1	1	0	1	0	0	Bishnupur	NS1	oct
36	1	0	1	0	0	0	1	Bishnupur	IgM	oct
71	0	1	1	0	0	0	1	Bishnupur	NS1	oct
35	0	1	1	0	0	0	1	Bishnupur	IgM	dec
40	1	0	1	0	0	0	1	Bishnupur	IgM	dec
52	0	1	1	0	0	1	0	Bishnupur	IgM	dec
78	0	1	1	0	0	1	0	Bishnupur	IgM	dec
0.4	0	1	1	0	0	0	1	Bishnupur	IgM	august
0.7	1	0	1	0	0	0	1	Bishnupur	IgM	august
3	0	1	1	0	0	0	1	Bishnupur	IgM	august
4	0	1	1	0	0	0	1	Bishnupur	IgM	august
10	1	0	1	0	0	0	1	Bishnupur	IgM	august
11	0	1	1	0	1	0	0	Bishnupur	IgM	august
12	0	1	1	0	0	1	0	Bishnupur	IgM	august
12	0	1	1	0	0	1	0	Bishnupur	IgM	august
16	0	1	1	0	0	0	1	Bishnupur	IgM	august
17	0	1	1	0	1	0	0	Bishnupur	IgM	august
18	1	0	1	0	0	0	1	Bishnupur	IgM	august
18	0	1	1	0	0	1	0	Bishnupur	IgM	august
22	1	0	1	0	0	1	0	Bishnupur	IgM	august
24	1	0	1	0	1	0	0	Bishnupur	IgM	august
25	0	1	1	0	0	1	0	Bishnupur	IgM	august
25	0	1	1	0	0	0	1	Bishnupur	IgM	august
30	0	1	1	0	0	1	0	Bishnupur	IgM	august
32	1	0	1	0	0	0	1	Bishnupur	IgM	august
35	1	0	1	0	0	0	1	Bishnupur	IgM	august
35	0	1	1	0	0	1	0	Bishnupur	IgM	august
38	0	1	1	0	0	1	0	Bishnupur	IgM	august
39	0	1	1	0	0	0	1	Bishnupur	IgM	august
39	0	1	1	0	0	0	1	Bishnupur	IgM	august
40	0	1	1	0	0	1	0	Bishnupur	IgM	august
40	1	0	1	0	0	1	0	Bishnupur	IgM	august
41	0	1	1	0	0	1	0	Bishnupur	IgM	august
43	0	1	1	0	1	0	0	Bishnupur	IgM	august
45	0	1	1	0	1	0	0	Bishnupur	IgM	august
45	1	0	1	0	0	1	0	Bishnupur	IgM	august
55	1	0	1	0	0	0	1	Bishnupur	IgM	august
57	0	1	1	0	0	0	1	Bishnupur	IgM	august
62	0	1	1	0	0	0	1	Bishnupur	IgM	august
20	1	0	1	0	0	0	1	Bishnupur	IgM	july
30	1	0	1	0	0	0	1	Bishnupur	IgM	july
35	0	1	1	0	1	0	0	bishnupur	IgM	july
60	1	0	1	0	0	0	1	Bishnupur	IgM	july
22	0	1	1	0	1	0	0	chandel	IgM	May
0.1	0	1	1	0	0	0	1	Chandel	IgM	sep
1	0	1	1	0	0	0	1	Chandel	IgM	sep
4	1	0	1	0	0	0	1	Chandel	IgM	sep
4	0	1	1	0	1	0	0	Chandel	IgM	sep
7	1	0	1	0	0	1	0	Chandel	IgM	sep
7	0	1	1	0	0	1	0	Chandel	IgM	sep
8	1	0	1	0	1	0	0	Chandel	IgM	sep
8	1	0	1	0	0	0	1	Chandel	IgM	sep
8	0	1	1	0	0	1	0	Chandel	IgM	sep
10	1	0	1	0	0	1	0	Chandel	IgM	sep
10	0	1	1	0	0	1	0	Chandel	IgM	sep
11	0	1	1	0	0	0	1	Chandel	IgM	sep
16	0	1	1	0	0	1	0	Chandel	IgM	sep
16	0	1	1	0	0	1	0	Chandel	IgM	sep
16	1	0	1	0	0	0	1	Chandel	IgM	sep
22	1	0	1	0	0	0	1	Chandel	IgM	sep
23	0	1	1	0	0	1	0	Chandel	IgM	sep
24	1	0	1	0	0	0	1	Chandel	IgM	sep
25	0	1	1	0	0	1	0	Chandel	IgM	sep
27	1	0	1	0	0	1	0	Chandel	IgM	sep
50	0	1	1	0	0	1	0	Chandel	IgM	sep
52	0	1	1	0	1	0	0	Chandel	IgM	sep
56	1	0	1	0	0	0	1	Chandel	IgM	sep
56	0	1	1	0	1	0	0	Chandel	IgM	sep
72	1	0	1	0	0	0	1	Chandel	IgM	sep
17	0	1	1	0	0	0	1	Chandel	IgM	oct
22	1	0	1	0	0	0	1	Chandel	IgM	oct
32	1	0	1	0	0	0	1	Chandel	NS1	oct
51	1	0	1	0	0	1	0	Chandel	IgM	oct
70	1	0	1	0	0	0	1	Chandel	NS1	oct
48	0	1	1	0	0	1	0	Chandel	NS1	nov
75	0	1	1	0	0	0	1	Chandel	NS1	nov
3.6	0	1	1	0	0	0	1	Chandel	IgM	august
6	1	0	1	0	1	0	0	Chandel	IgM	august
7	1	0	1	0	1	0	0	Chandel	IgM	august
8	0	1	1	0	0	1	0	Chandel	IgM	august
8	0	1	1	0	1	0	0	Chandel	IgM	august
10	0	1	1	0	1	0	0	Chandel	IgM	august
11	0	1	1	0	0	0	1	Chandel	IgM	august
11	0	1	1	0	0	1	0	Chandel	IgM	august
13	1	0	1	0	0	1	0	Chandel	IgM	august
15	0	1	1	0	1	0	0	Chandel	IgM	august
15	0	1	1	0	0	0	1	Chandel	IgM	august
18	0	1	1	0	0	1	0	Chandel	IgM	august
18	1	0	1	0	0	0	1	Chandel	IgM	august
25	1	0	1	0	0	0	1	Chandel	IgM	august
25	0	1	1	0	0	0	1	Chandel	IgM	august
27	1	0	1	0	1	0	0	Chandel	IgM	august
27	1	0	1	0	1	0	0	Chandel	IgM	august
29	1	0	1	0	0	0	1	Chandel	IgM	august
33	1	0	1	0	0	1	0	Chandel	IgM	august
36	1	0	1	0	0	1	0	Chandel	IgM	august
38	1	0	1	0	0	0	1	Chandel	IgM	august
40	1	0	1	0	0	0	1	Chandel	IgM	august
41	1	0	1	0	0	0	1	Chandel	IgM	august
44	0	1	1	0	0	0	1	Chandel	IgM	august
50	1	0	1	0	0	0	1	Chandel	IgM	august
60	1	0	1	0	0	1	0	Chandel	IgM	august
86	0	1	1	0	0	0	1	Chandel	IgM	august
12	0	1	1	0	0	1	0	Chandel	IgM	july
41	0	1	1	0	0	0	1	Chandel	IgM	july
67	1	0	1	0	0	0	1	Chandel	IgM	july
21	1	0	1	0	0	1	0	Chandel	IgM	august
13	1	0	1	0	0	1	0	Chnadel	IgM	sep
76	0	1	1	0	0	0	1	churacahndpur	IgM	May
1.2	1	0	1	0	0	0	1	churacahndpur	IgM	july
3	0	1	1	0	0	0	1	churacahndpur	IgM	july
4	0	1	1	0	0	1	0	churacahndpur	IgM	july
4	1	0	1	0	0	1	0	churacahndpur	IgM	july
4	1	0	1	0	1	0	0	churacahndpur	IgM	july
5	1	0	1	0	1	0	0	churacahndpur	IgM	july
6	0	1	1	0	1	0	0	churacahndpur	IgM	july
6	1	0	1	0	1	0	0	churacahndpur	IgM	july
7	0	1	1	0	1	0	0	churacahndpur	IgM	july
7	1	0	1	0	0	1	0	churacahndpur	IgM	july
8	0	1	1	0	1	0	0	churacahndpur	IgM	july
8	1	0	1	0	0	0	1	churacahndpur	IgM	july
8	0	1	1	0	1	0	0	churacahndpur	IgM	july
9	0	1	1	0	0	1	0	churacahndpur	IgM	july
9	1	0	1	0	0	1	0	churacahndpur	IgM	july
10	0	1	1	0	0	1	0	churacahndpur	IgM	july
10.6	0	1	1	0	0	1	0	churacahndpur	NS1	july
11	1	0	1	0	0	0	1	churacahndpur	IgM	july
12	0	1	1	0	1	0	0	churacahndpur	IgM	july
13	0	1	1	0	1	0	0	churacahndpur	IgM	july
13	0	1	1	0	0	1	0	churacahndpur	IgM	july
13	0	1	1	0	0	1	0	churacahndpur	IgM	july
13	0	1	1	0	0	0	1	churacahndpur	IgM	july
14	0	1	1	0	0	1	0	churacahndpur	IgM	july
14	0	1	1	0	0	0	1	churacahndpur	IgM	july
15	0	1	1	0	0	1	0	churacahndpur	IgM	july
16	1	0	1	0	1	0	0	churacahndpur	IgM	july
16	0	1	1	0	0	1	0	churacahndpur	IgM	july
16	1	0	1	0	0	0	1	churacahndpur	IgM	july
17	1	0	1	0	1	0	0	churacahndpur	IgM	july
17	0	1	1	0	0	1	0	churacahndpur	IgM	july
17	0	1	1	0	0	1	0	churacahndpur	IgM	july
17	1	0	1	0	1	0	0	churacahndpur	IgM	july
18	0	1	1	0	0	1	0	churacahndpur	IgM	july
18	0	1	1	0	0	0	1	churacahndpur	IgM	july
18	0	1	1	0	1	0	0	churacahndpur	IgM	july
20	0	1	1	0	0	1	0	churacahndpur	IgM	july
20	0	1	1	0	0	1	0	churacahndpur	IgM	july
20	1	0	1	0	0	1	0	churacahndpur	IgM	july
21	1	0	1	0	0	0	1	churacahndpur	IgM	july
21	0	1	1	0	1	0	0	churacahndpur	IgM	july
21	0	1	1	0	0	1	0	churacahndpur	IgM	july
21	0	1	1	0	0	1	0	churacahndpur	IgM	july
22	1	0	1	0	1	0	0	churacahndpur	IgM	july
22	1	0	1	0	1	0	0	churacahndpur	IgM	july
22	0	1	1	0	1	0	0	churacahndpur	IgM	july
22	0	1	1	0	0	1	0	churacahndpur	IgM	july
23	1	0	1	0	0	1	0	churacahndpur	IgM	july
23	0	1	1	0	1	0	0	churacahndpur	IgM	july
23	0	1	1	0	1	0	0	churacahndpur	IgM	july
23	0	1	1	0	0	0	1	churacahndpur	IgM	july
24	0	1	1	0	0	0	1	churacahndpur	IgM	july
24	0	1	1	0	0	0	1	churacahndpur	IgM	july
24	1	0	1	0	0	0	1	churacahndpur	IgM	july
25	1	0	1	0	0	1	0	churacahndpur	IgM	july
25	0	1	1	0	0	0	1	churacahndpur	IgM	july
25	0	1	1	0	1	0	0	churacahndpur	IgM	july
27	1	0	1	0	1	0	0	churacahndpur	IgM	july
27	0	1	1	0	1	0	0	churacahndpur	IgM	july
27	1	0	1	0	0	0	1	churacahndpur	IgM	july
27	1	0	1	0	1	0	0	churacahndpur	IgM	july
27	1	0	1	0	1	0	0	churacahndpur	IgM	july
28	0	1	1	0	1	0	0	churacahndpur	IgM	july
28	1	0	1	0	0	1	0	churacahndpur	IgM	july
28	0	1	1	0	1	0	0	churacahndpur	IgM	july
29	1	0	1	0	0	0	1	churacahndpur	IgM	july
29	0	1	1	0	0	0	1	churacahndpur	IgM	july
30	0	1	1	0	0	1	0	churacahndpur	IgM	july
30	0	1	1	0	0	0	1	churacahndpur	IgM	july
30	1	0	1	0	0	0	1	churacahndpur	IgM	july
30	0	1	1	0	1	0	0	churacahndpur	IgM	july
30	1	0	1	0	1	0	0	churacahndpur	IgM	july
31	0	1	1	0	0	0	1	churacahndpur	IgM	july
31	1	0	1	0	0	1	0	churacahndpur	IgM	july
35	0	1	1	0	0	0	1	churacahndpur	IgM	july
36	1	0	1	0	0	0	1	churacahndpur	IgM	july
36	0	1	1	0	0	1	0	churacahndpur	IgM	july
36	1	0	1	0	0	0	1	churacahndpur	IgM	july
36	0	1	1	0	1	0	0	churacahndpur	IgM	july
37	0	1	1	0	0	0	1	churacahndpur	IgM	july
37	0	1	1	0	1	0	0	churacahndpur	IgM	july
38	1	0	1	0	0	0	1	churacahndpur	IgM	july
40	0	1	1	0	0	1	0	churacahndpur	IgM	july
40	1	0	1	0	0	0	1	churacahndpur	IgM	july
40	1	0	1	0	0	0	1	churacahndpur	IgM	july
40	1	0	1	0	1	0	0	churacahndpur	IgM	july
42	0	1	1	0	0	0	1	churacahndpur	IgM	july
43	0	1	1	0	0	1	0	churacahndpur	IgM	july
45	0	1	1	0	0	1	0	churacahndpur	IgM	july
45	0	1	1	0	0	0	1	churacahndpur	IgM	july
45	0	1	1	0	1	0	0	churacahndpur	IgM	july
46	0	1	1	0	0	1	0	churacahndpur	IgM	july
47	0	1	1	0	0	1	0	churacahndpur	IgM	july
48	0	1	1	0	0	0	1	churacahndpur	IgM	july
49	0	1	1	0	0	1	0	churacahndpur	IgM	july
50	1	0	1	0	0	0	1	churacahndpur	IgM	july
50	0	1	1	0	0	0	1	churacahndpur	IgM	july
50	1	0	1	0	1	0	0	churacahndpur	IgM	july
50	1	0	1	0	1	0	0	churacahndpur	IgM	july
51	0	1	1	0	1	0	0	churacahndpur	IgM	july
52	0	1	1	0	1	0	0	churacahndpur	IgM	july
53	1	0	1	0	0	0	1	churacahndpur	IgM	july
56	1	0	1	0	0	0	1	churacahndpur	IgM	july
58	1	0	1	0	0	0	1	churacahndpur	IgM	july
58	1	0	1	0	0	0	1	churacahndpur	IgM	july
62	0	1	1	0	0	0	1	churacahndpur	IgM	july
64	0	1	1	0	1	0	0	churacahndpur	IgM	july
65	1	0	1	0	0	0	1	churacahndpur	IgM	july
66	0	1	1	0	1	0	0	churacahndpur	IgM	july
67	1	0	1	0	0	0	1	churacahndpur	IgM	july
80	0	1	1	0	0	1	0	churacahndpur	IgM	july
2	1	0	1	0	0	0	1	churacahndpur	IgM	june
2	1	0	1	0	0	0	1	churacahndpur	IgM	june
4	0	1	1	0	0	1	0	churacahndpur	IgM	june
6	1	0	1	0	0	1	0	churacahndpur	IgM	june
6	0	1	1	0	1	0	0	churacahndpur	IgM	june
6	0	1	1	0	0	1	0	churacahndpur	IgM	june
8	0	1	1	0	1	0	0	churacahndpur	IgM	june
9	1	0	1	0	0	0	1	churacahndpur	IgM	june
12	0	1	1	0	1	0	0	churacahndpur	IgM	june
15	0	1	1	0	1	0	0	churacahndpur	IgM	june
17	1	0	1	0	1	0	0	churacahndpur	IgM	june
18	0	1	1	0	1	0	0	churacahndpur	IgM	june
18	1	0	1	0	0	0	1	churacahndpur	IgM	june
20	1	0	1	0	0	0	1	churacahndpur	IgM	june
20	0	1	1	0	1	0	0	churacahndpur	IgM	june
21	0	1	1	0	1	0	0	churacahndpur	IgM	june
27	1	0	1	0	1	0	0	churacahndpur	IgM	june
30	1	0	1	0	0	1	0	churacahndpur	IgM	june
30	0	1	1	0	0	0	1	churacahndpur	IgM	june
30	0	1	1	0	0	1	0	churacahndpur	IgM	june
32	1	0	1	0	0	0	1	churacahndpur	IgM	june
33	0	1	1	0	0	1	0	churacahndpur	IgM	june
60	0	1	1	0	1	0	0	churacahndpur	IgM	june
65	0	1	1	0	0	0	1	churacahndpur	IgM	june
3.6	1	0	1	0	0	0	1	Churachadnpur	NS1	july
0.021	0	1	1	0	0	1	0	Churachandpur	IgM	sep
8	0	1	1	0	0	0	1	Churachandpur	IgM	sep
9	0	1	1	0	0	0	1	Churachandpur	IgM	sep
9	0	1	1	0	1	0	0	Churachandpur	IgM	sep
9	0	1	1	0	0	0	1	Churachandpur	IgM	sep
10	1	0	1	0	0	0	1	Churachandpur	IgM	sep
16	1	0	1	0	0	0	1	Churachandpur	IgM	sep
16	0	1	1	0	0	0	1	Churachandpur	IgM	sep
17	0	1	1	0	0	1	0	Churachandpur	IgM	sep
17	0	1	1	0	0	0	1	Churachandpur	IgM	sep
23	0	1	1	0	0	0	1	Churachandpur	IgM	sep
23	1	0	1	0	0	1	0	Churachandpur	IgM	sep
25	0	1	1	0	0	0	1	Churachandpur	IgM	sep
26	1	0	1	0	0	0	1	Churachandpur	IgM	sep
27	1	0	1	0	0	1	0	Churachandpur	IgM	sep
30	0	1	1	0	0	0	1	Churachandpur	IgM	sep
31	0	1	1	0	0	0	1	Churachandpur	IgM	sep
32	0	1	1	0	0	0	1	Churachandpur	IgM	sep
32	0	1	1	0	0	0	1	Churachandpur	IgM	sep
33	1	0	1	0	0	1	0	Churachandpur	IgM	sep
34	0	1	1	0	0	1	0	Churachandpur	IgM	sep
40	1	0	1	0	0	0	1	Churachandpur	IgM	sep
41	0	1	1	0	0	0	1	Churachandpur	IgM	sep
42	1	0	1	0	0	0	1	Churachandpur	IgM	sep
46	1	0	1	0	0	0	1	Churachandpur	IgM	sep
52	0	1	1	0	0	0	1	Churachandpur	IgM	sep
68	1	0	1	0	0	0	1	Churachandpur	IgM	sep
70	0	1	1	0	0	0	1	Churachandpur	IgM	sep
4	0	1	1	0	0	1	0	Churachandpur	IgM	oct
5	0	1	1	0	0	0	1	Churachandpur	IgM	oct
6	1	0	1	0	0	1	0	Churachandpur	IgM	oct
10	1	0	1	0	0	0	1	Churachandpur	IgM	oct
11	0	1	1	0	0	0	1	Churachandpur	IgM	oct
18	0	1	1	0	1	0	0	Churachandpur	NS1	oct
35	0	1	1	0	0	0	1	Churachandpur	NS1	oct
53	1	0	1	0	0	0	1	Churachandpur	IgM	oct
55	0	1	1	0	0	0	1	Churachandpur	IgM	oct
1	0	1	1	0	0	1	0	Churachandpur	IgM	august
1	0	1	1	0	0	0	1	Churachandpur	IgM	august
1.4	0	1	1	0	0	0	1	Churachandpur	IgM	august
1.8	0	1	1	0	0	0	1	Churachandpur	IgM	august
2	1	0	1	0	1	0	0	Churachandpur	IgM	august
2	1	0	1	0	0	0	1	Churachandpur	IgM	august
3	1	0	1	0	0	1	0	Churachandpur	IgM	august
3	0	1	1	0	0	1	0	Churachandpur	IgM	august
3	0	1	1	0	0	0	1	Churachandpur	IgM	august
3	1	0	1	0	1	0	0	Churachandpur	IgM	august
3	1	0	1	0	1	0	0	Churachandpur	IgM	august
3	0	1	1	0	0	0	1	Churachandpur	IgM	august
3.4	0	1	1	0	0	0	1	Churachandpur	IgM	august
4	1	0	1	0	0	0	1	Churachandpur	IgM	august
4	0	1	1	0	0	0	1	Churachandpur	IgM	august
4	0	1	1	0	0	0	1	Churachandpur	IgM	august
4	1	0	1	0	0	0	1	Churachandpur	IgM	august
4	0	1	1	0	1	0	0	Churachandpur	IgM	august
4	0	1	1	0	0	0	1	Churachandpur	IgM	august
4	1	0	1	0	0	0	1	Churachandpur	IgM	august
4	0	1	1	0	0	1	0	Churachandpur	IgM	august
4	1	0	1	0	0	1	0	Churachandpur	IgM	august
4.5	0	1	1	0	0	0	1	Churachandpur	IgM	august
5	1	0	1	0	1	0	0	Churachandpur	IgM	august
5	0	1	1	0	1	0	0	Churachandpur	IgM	august
5	0	1	1	0	0	0	1	Churachandpur	IgM	august
5	0	1	1	0	0	0	1	Churachandpur	IgM	august
5.6	0	1	1	0	0	0	1	Churachandpur	IgM	august
6	0	1	1	0	0	1	0	Churachandpur	IgM	august
6	0	1	1	0	0	1	0	Churachandpur	IgM	august
6	0	1	1	0	0	0	1	Churachandpur	IgM	august
6	1	0	1	0	0	0	1	Churachandpur	IgM	august
6	1	0	1	0	0	0	1	Churachandpur	IgM	august
7	0	1	1	0	0	0	1	Churachandpur	IgM	august
7	1	0	1	0	0	1	0	Churachandpur	IgM	august
7	1	0	1	0	0	0	1	Churachandpur	IgM	august
8	0	1	1	0	0	1	0	Churachandpur	IgM	august
8	1	0	1	0	0	0	1	Churachandpur	IgM	august
8	1	0	1	0	0	0	1	Churachandpur	IgM	august
8	0	1	1	0	0	0	1	Churachandpur	IgM	august
9	1	0	1	0	0	1	0	Churachandpur	IgM	august
9	0	1	1	0	0	0	1	Churachandpur	IgM	august
9	0	1	1	0	0	1	0	Churachandpur	IgM	august
9	1	0	1	0	0	0	1	Churachandpur	IgM	august
9	0	1	1	0	0	0	1	Churachandpur	IgM	august
10	0	1	1	0	0	0	1	Churachandpur	IgM	august
10	0	1	1	0	0	1	0	Churachandpur	IgM	august
10	0	1	1	0	0	0	1	Churachandpur	IgM	august
10	0	1	1	0	0	0	1	Churachandpur	IgM	august
10	0	1	1	0	0	1	0	Churachandpur	IgM	august
10	1	0	1	0	0	1	0	Churachandpur	IgM	august
10	1	0	1	0	0	1	0	Churachandpur	IgM	august
10	0	1	1	0	0	0	1	Churachandpur	IgM	august
10	1	0	1	0	0	0	1	Churachandpur	IgM	august
10	0	1	1	0	0	0	1	Churachandpur	IgM	august
11	1	0	1	0	0	0	1	Churachandpur	IgM	august
11	1	0	1	0	0	0	1	Churachandpur	IgM	august
12	0	1	1	0	0	0	1	Churachandpur	IgM	august
12	0	1	1	0	0	0	1	Churachandpur	IgM	august
12	1	0	1	0	0	0	1	Churachandpur	IgM	august
12	0	1	1	0	0	0	1	Churachandpur	IgM	august
12	0	1	1	0	1	0	0	Churachandpur	IgM	august
12	0	1	1	0	0	1	0	Churachandpur	IgM	august
12	0	1	1	0	0	0	1	Churachandpur	IgM	august
12	1	0	1	0	0	1	0	Churachandpur	IgM	august
12	0	1	1	0	0	0	1	Churachandpur	IgM	august
12	0	1	1	0	0	0	1	Churachandpur	IgM	august
12	0	1	1	0	0	0	1	Churachandpur	IgM	august
13	1	0	1	0	0	1	0	Churachandpur	IgM	august
13	1	0	1	0	0	1	0	Churachandpur	IgM	august
13	0	1	1	0	0	1	0	Churachandpur	IgM	august
13	1	0	1	0	0	0	1	Churachandpur	IgM	august
13	0	1	1	0	0	0	1	Churachandpur	IgM	august
13	0	1	1	0	0	0	1	Churachandpur	IgM	august
13	0	1	1	0	0	0	1	Churachandpur	IgM	august
14	0	1	1	0	0	1	0	Churachandpur	IgM	august
14	0	1	1	0	0	1	0	Churachandpur	IgM	august
14	0	1	1	0	0	0	1	Churachandpur	IgM	august
14	1	0	1	0	0	0	1	Churachandpur	IgM	august
14	0	1	1	0	0	0	1	Churachandpur	IgM	august
14	0	1	1	0	0	0	1	Churachandpur	IgM	august
15	1	0	1	0	0	0	1	Churachandpur	IgM	august
15	1	0	1	0	0	0	1	Churachandpur	IgM	august
15	0	1	1	0	0	0	1	Churachandpur	IgM	august
15	1	0	1	0	0	0	1	Churachandpur	IgM	august
15	0	1	1	0	0	1	0	Churachandpur	IgM	august
16	0	1	1	0	0	1	0	Churachandpur	IgM	august
16	1	0	1	0	0	0	1	Churachandpur	IgM	august
16	0	1	1	0	0	0	1	Churachandpur	IgM	august
16	0	1	1	0	0	1	0	Churachandpur	IgM	august
16	1	0	1	0	0	0	1	Churachandpur	IgM	august
16	0	1	1	0	1	0	0	Churachandpur	IgM	august
17	1	0	1	0	0	0	1	Churachandpur	IgM	august
17	1	0	1	0	0	0	1	Churachandpur	IgM	august
17	1	0	1	0	0	0	1	Churachandpur	IgM	august
17	0	1	1	0	1	0	0	Churachandpur	IgM	august
18	0	1	1	0	0	1	0	Churachandpur	IgM	august
18	0	1	1	0	0	0	1	Churachandpur	IgM	august
18	0	1	1	0	0	0	1	Churachandpur	IgM	august
18	1	0	1	0	0	1	0	Churachandpur	IgM	august
19	1	0	1	0	0	0	1	Churachandpur	IgM	august
19	0	1	1	0	0	0	1	Churachandpur	IgM	august
20	0	1	1	0	0	0	1	Churachandpur	IgM	august
20	0	1	1	0	0	1	0	Churachandpur	IgM	august
20	1	0	1	0	0	0	1	Churachandpur	IgM	august
20	1	0	1	0	0	1	0	Churachandpur	IgM	august
21	1	0	1	0	0	0	1	Churachandpur	IgM	august
21	0	1	1	0	0	0	1	Churachandpur	IgM	august
21	1	0	1	0	1	0	0	Churachandpur	IgM	august
22	0	1	1	0	0	1	0	Churachandpur	IgM	august
22	0	1	1	0	0	0	1	Churachandpur	IgM	august
22	1	0	1	0	0	0	1	Churachandpur	IgM	august
22	0	1	1	0	0	0	1	Churachandpur	IgM	august
23	0	1	1	0	0	0	1	Churachandpur	IgM	august
23	1	0	1	0	0	1	0	Churachandpur	IgM	august
23	1	0	1	0	0	0	1	Churachandpur	IgM	august
23	0	1	1	0	0	0	1	Churachandpur	IgM	august
23	0	1	1	0	0	0	1	Churachandpur	IgM	august
23	1	0	1	0	1	0	0	Churachandpur	IgM	august
23	1	0	1	0	0	0	1	Churachandpur	IgM	august
24	0	1	1	0	0	1	0	Churachandpur	IgM	august
24	1	0	1	0	0	0	1	Churachandpur	IgM	august
24	0	1	1	0	0	1	0	Churachandpur	IgM	august
24	1	0	1	0	0	0	1	Churachandpur	IgM	august
25	1	0	1	0	0	0	1	Churachandpur	IgM	august
26	0	1	1	0	0	0	1	Churachandpur	IgM	august
26	1	0	1	0	0	0	1	Churachandpur	IgM	august
27	0	1	1	0	0	1	0	Churachandpur	IgM	august
28	0	1	1	0	0	0	1	Churachandpur	IgM	august
28	1	0	1	0	0	1	0	Churachandpur	IgM	august
28	0	1	1	0	0	1	0	Churachandpur	IgM	august
28	1	0	1	0	0	0	1	Churachandpur	IgM	august
29	0	1	1	0	0	1	0	Churachandpur	IgM	august
29	0	1	1	0	0	1	0	Churachandpur	IgM	august
30	1	0	1	0	0	0	1	Churachandpur	IgM	august
30	1	0	1	0	0	0	1	Churachandpur	IgM	august
30	0	1	1	0	0	1	0	Churachandpur	IgM	august
30	0	1	1	0	0	0	1	Churachandpur	IgM	august
30	1	0	1	0	0	0	1	Churachandpur	IgM	august
31	1	0	1	0	0	0	1	Churachandpur	IgM	august
31	0	1	1	0	0	1	0	Churachandpur	IgM	august
32	0	1	1	0	1	0	0	Churachandpur	IgM	august
32	0	1	1	0	0	0	1	Churachandpur	IgM	august
33	1	0	1	0	0	1	0	Churachandpur	IgM	august
34	1	0	1	0	0	0	1	Churachandpur	IgM	august
34	1	0	1	0	0	0	1	Churachandpur	IgM	august
35	0	1	1	0	0	0	1	Churachandpur	IgM	august
37	0	1	1	0	0	0	1	Churachandpur	IgM	august
39	1	0	1	0	0	0	1	Churachandpur	IgM	august
39	0	1	1	0	0	1	0	Churachandpur	IgM	august
40	1	0	1	0	0	0	1	Churachandpur	IgM	august
40	1	0	1	0	0	1	0	Churachandpur	IgM	august
40	1	0	1	0	1	0	0	Churachandpur	IgM	august
40	0	1	1	0	0	0	1	Churachandpur	IgM	august
40	1	0	1	0	0	0	1	Churachandpur	IgM	august
42	0	1	1	0	1	0	0	Churachandpur	IgM	august
43	1	0	1	0	0	1	0	Churachandpur	IgM	august
45	0	1	1	0	0	0	1	Churachandpur	IgM	august
45	0	1	1	0	0	0	1	Churachandpur	IgM	august
47	0	1	1	0	0	0	1	Churachandpur	IgM	august
47	1	0	1	0	0	0	1	Churachandpur	IgM	august
47	1	0	1	0	0	0	1	Churachandpur	IgM	august
47	1	0	1	0	0	0	1	Churachandpur	IgM	august
47	1	0	1	0	0	0	1	Churachandpur	IgM	august
48	1	0	1	0	1	0	0	Churachandpur	IgM	august
48	0	1	1	0	1	0	0	Churachandpur	IgM	august
51	1	0	1	0	0	1	0	Churachandpur	IgM	august
51	0	1	1	0	0	0	1	Churachandpur	IgM	august
52	0	1	1	0	1	0	0	Churachandpur	IgM	august
53	1	0	1	0	0	0	1	Churachandpur	IgM	august
54	0	1	1	0	0	0	1	Churachandpur	IgM	august
56	1	0	1	0	0	1	0	Churachandpur	IgM	august
56	1	0	1	0	0	0	1	Churachandpur	IgM	august
56	1	0	1	0	0	1	0	Churachandpur	IgM	august
56	1	0	1	0	0	0	1	Churachandpur	IgM	august
58	1	0	1	0	0	0	1	Churachandpur	IgM	august
60	0	1	1	0	0	0	1	Churachandpur	IgM	august
60	1	0	1	0	0	0	1	Churachandpur	IgM	august
63	1	0	1	0	0	0	1	Churachandpur	IgM	august
64	0	1	1	0	0	0	1	Churachandpur	IgM	august
65	0	1	1	0	0	0	1	Churachandpur	IgM	august
65	0	1	1	0	0	0	1	Churachandpur	IgM	august
65	0	1	1	0	0	0	1	Churachandpur	IgM	august
65	1	0	1	0	0	1	0	Churachandpur	IgM	august
65	1	0	1	0	0	0	1	Churachandpur	IgM	august
75	1	0	1	0	0	1	0	Churachandpur	IgM	august
80	0	1	1	0	0	0	1	Churachandpur	IgM	august
88	0	1	1	0	0	0	1	Churachandpur	IgM	august
6	0	1	1	0	0	0	1	Churachandpur	IgM	august
0.6	0	1	1	0	0	0	1	Churachandpur	NS1	july
1.7	0	1	1	0	0	0	1	Churachandpur	NS1	july
2.5	1	0	1	0	0	0	1	Churachandpur	IgM	july
3	1	0	1	0	1	0	0	Churachandpur	IgM	july
4	1	0	1	0	0	0	1	Churachandpur	IgM	july
4	0	1	1	0	0	1	0	Churachandpur	IgM	july
4	1	0	1	0	1	0	0	Churachandpur	IgM	july
4.6	0	1	1	0	0	0	1	Churachandpur	NS1	july
5	0	1	1	0	0	1	0	Churachandpur	IgM	july
5	1	0	1	0	0	0	1	Churachandpur	IgM	july
5	0	1	1	0	1	0	0	Churachandpur	IgM	july
5	1	0	1	0	0	0	1	Churachandpur	NS1	july
5	0	1	1	0	0	0	1	Churachandpur	NS1	july
6	1	0	1	0	0	1	0	Churachandpur	IgM	july
6	0	1	1	0	0	0	1	Churachandpur	IgM	july
6	1	0	1	0	0	0	1	Churachandpur	IgM	july
6	0	1	1	0	0	0	1	Churachandpur	IgM	july
6	0	1	1	0	0	0	1	Churachandpur	NS1	july
6	1	0	1	0	0	0	1	Churachandpur	NS1	july
7	1	0	1	0	1	0	0	Churachandpur	IgM	july
7	1	0	1	0	1	0	0	Churachandpur	IgM	july
7	1	0	1	0	0	0	1	Churachandpur	NS1	july
8	0	1	1	0	0	0	1	Churachandpur	IgM	july
8	0	1	1	0	0	1	0	Churachandpur	IgM	july
9	1	0	1	0	1	0	0	Churachandpur	IgM	july
9	0	1	1	0	0	0	1	Churachandpur	NS1	july
10	0	1	1	0	0	0	1	Churachandpur	IgM	july
10	1	0	1	0	0	0	1	Churachandpur	IgM	july
10	1	0	1	0	0	0	1	Churachandpur	IgM	july
10	1	0	1	0	0	1	0	Churachandpur	IgM	july
10	0	1	1	0	0	0	1	Churachandpur	IgM	july
10	0	1	1	0	0	0	1	Churachandpur	NS1	july
10	0	1	1	0	1	0	0	Churachandpur	NS1	july
11	0	1	1	0	0	0	1	Churachandpur	IgM	july
11	0	1	1	0	0	0	1	Churachandpur	NS1	july
11	0	1	1	0	0	0	1	Churachandpur	NS1	july
11	1	0	1	0	0	0	1	Churachandpur	NS1	july
12	1	0	1	0	0	0	1	Churachandpur	IgM	july
12	0	1	1	0	0	0	1	Churachandpur	IgM	july
12	1	0	1	0	1	0	0	Churachandpur	IgM	july
12	0	1	1	0	0	0	1	Churachandpur	IgM	july
12	1	0	1	0	0	0	1	Churachandpur	IgM	july
13	1	0	1	0	0	0	1	Churachandpur	IgM	july
13	0	1	1	0	0	0	1	Churachandpur	IgM	july
13	1	0	1	0	0	0	1	Churachandpur	IgM	july
13	0	1	1	0	0	0	1	Churachandpur	IgM	july
13	1	0	1	0	0	0	1	Churachandpur	NS1	july
13	1	0	1	0	0	0	1	Churachandpur	NS1	july
13	1	0	1	0	0	0	1	Churachandpur	NS1	july
14	1	0	1	0	0	0	1	Churachandpur	IgM	july
14	1	0	1	0	1	0	0	Churachandpur	IgM	july
14	1	0	1	0	0	0	1	Churachandpur	NS1	july
14	0	1	1	0	0	0	1	Churachandpur	NS1	july
14	0	1	1	0	0	0	1	Churachandpur	NS1	july
15	1	0	1	0	1	0	0	Churachandpur	IgM	july
15	1	0	1	0	0	0	1	Churachandpur	IgM	july
15	1	0	1	0	0	0	1	Churachandpur	IgM	july
15	0	1	1	0	0	0	1	Churachandpur	NS1	july
15	0	1	1	0	0	0	1	Churachandpur	NS1	july
16	0	1	1	0	0	0	1	Churachandpur	IgM	july
16	1	0	1	0	0	0	1	Churachandpur	IgM	july
17	0	1	1	0	0	0	1	Churachandpur	IgM	july
17	0	1	1	0	0	1	0	Churachandpur	IgM	july
17	1	0	1	0	0	0	1	Churachandpur	NS1	july
17	0	1	1	0	0	0	1	Churachandpur	NS1	july
17	1	0	1	0	0	0	1	Churachandpur	NS1	july
18	0	1	1	0	0	0	1	Churachandpur	IgM	july
18	0	1	1	0	0	0	1	Churachandpur	IgM	july
18	0	1	1	0	1	0	0	Churachandpur	IgM	july
18	0	1	1	0	0	1	0	Churachandpur	IgM	july
19	1	0	1	0	0	1	0	Churachandpur	IgM	july
19	0	1	1	0	1	0	0	Churachandpur	NS1	july
20	0	1	1	0	0	0	1	Churachandpur	IgM	july
20	0	1	1	0	1	0	0	Churachandpur	IgM	july
20	0	1	1	0	0	0	1	Churachandpur	IgM	july
20	0	1	1	0	0	0	1	Churachandpur	NS1	july
21	0	1	1	0	0	0	1	Churachandpur	NS1	july
21	0	1	1	0	0	0	1	Churachandpur	NS1	july
21	1	0	1	0	1	0	0	Churachandpur	NS1	july
22	1	0	1	0	0	0	1	Churachandpur	IgM	july
22	0	1	1	0	0	1	0	Churachandpur	NS1	july
22	0	1	1	0	0	0	1	Churachandpur	NS1	july
23	1	0	1	0	1	0	0	Churachandpur	IgM	july
23	0	1	1	0	0	0	1	Churachandpur	IgM	july
23	0	1	1	0	0	0	1	Churachandpur	NS1	july
24	0	1	1	0	0	1	0	Churachandpur	IgM	july
24	0	1	1	0	0	0	1	Churachandpur	NS1	july
25	1	0	1	0	0	0	1	Churachandpur	IgM	july
25	0	1	1	0	0	0	1	Churachandpur	IgM	july
25	1	0	1	0	0	0	1	Churachandpur	IgM	july
25	0	1	1	0	0	0	1	Churachandpur	NS1	july
26	1	0	1	0	0	0	1	Churachandpur	NS1	july
26	1	0	1	0	0	0	1	Churachandpur	NS1	july
27	0	1	1	0	0	0	1	Churachandpur	IgM	july
27	0	1	1	0	1	0	0	Churachandpur	IgM	july
27	0	1	1	0	0	1	0	Churachandpur	IgM	july
27	0	1	1	0	0	1	0	Churachandpur	IgM	july
27	0	1	1	0	0	0	1	Churachandpur	NS1	july
27	1	0	1	0	0	0	1	Churachandpur	NS1	july
27	0	1	1	0	1	0	0	Churachandpur	NS1	july
27	1	0	1	0	0	0	1	Churachandpur	NS1	july
28	1	0	1	0	0	0	1	Churachandpur	IgM	july
28	0	1	1	0	1	0	0	Churachandpur	IgM	july
28	1	0	1	0	0	1	0	Churachandpur	IgM	july
28	1	0	1	0	0	0	1	Churachandpur	IgM	july
28	0	1	1	0	0	0	1	Churachandpur	IgM	july
30	1	0	1	0	0	0	1	Churachandpur	IgM	july
30	0	1	1	0	0	0	1	Churachandpur	IgM	july
30	1	0	1	0	0	1	0	Churachandpur	IgM	july
30	0	1	1	0	0	1	0	Churachandpur	IgM	july
30	0	1	1	0	0	0	1	Churachandpur	IgM	july
30	1	0	1	0	0	0	1	Churachandpur	IgM	july
30	0	1	1	0	0	0	1	Churachandpur	NS1	july
31	0	1	1	0	0	0	1	Churachandpur	IgM	july
31	1	0	1	0	0	1	0	Churachandpur	IgM	july
32	0	1	1	0	1	0	0	Churachandpur	NS1	july
32	0	1	1	0	0	0	1	Churachandpur	NS1	july
32	1	0	1	0	0	0	1	Churachandpur	NS1	july
33	0	1	1	0	0	0	1	Churachandpur	IgM	july
33	1	0	1	0	0	0	1	Churachandpur	IgM	july
33	0	1	1	0	0	1	0	Churachandpur	IgM	july
35	1	0	1	0	0	1	0	Churachandpur	IgM	july
35	0	1	1	0	0	0	1	Churachandpur	NS1	july
35	0	1	1	0	0	0	1	Churachandpur	NS1	july
35	1	0	1	0	0	0	1	Churachandpur	NS1	july
36	0	1	1	0	0	0	1	Churachandpur	IgM	july
36	0	1	1	0	0	0	1	Churachandpur	NS1	july
37	1	0	1	0	0	0	1	Churachandpur	IgM	july
37	1	0	1	0	0	0	1	Churachandpur	IgM	july
37	1	0	1	0	0	0	1	churachandpur	IgM	july
37	0	1	1	0	0	0	1	Churachandpur	NS1	july
37	1	0	1	0	0	0	1	Churachandpur	NS1	july
38	0	1	1	0	0	0	1	Churachandpur	IgM	july
38	1	0	1	0	0	0	1	Churachandpur	IgM	july
38	0	1	1	0	0	1	0	Churachandpur	NS1	july
39	0	1	1	0	1	0	0	Churachandpur	IgM	july
40	0	1	1	0	0	0	1	Churachandpur	IgM	july
40	1	0	1	0	0	0	1	Churachandpur	IgM	july
40	0	1	1	0	1	0	0	Churachandpur	IgM	july
40	0	1	1	0	0	0	1	Churachandpur	IgM	july
40	1	0	1	0	0	0	1	Churachandpur	IgM	july
40	0	1	1	0	0	0	1	Churachandpur	IgM	july
40	1	0	1	0	1	0	0	Churachandpur	IgM	july
40	0	1	1	0	0	0	1	Churachandpur	NS1	july
40	0	1	1	0	0	0	1	Churachandpur	NS1	july
40	0	1	1	0	0	0	1	Churachandpur	NS1	july
42	0	1	1	0	0	0	1	Churachandpur	IgM	july
42	1	0	1	0	0	0	1	Churachandpur	NS1	july
43	0	1	1	0	0	0	1	Churachandpur	IgM	july
43	1	0	1	0	0	0	1	Churachandpur	NS1	july
43	1	0	1	0	0	0	1	Churachandpur	NS1	july
45	0	1	1	0	0	0	1	Churachandpur	IgM	july
45	1	0	1	0	0	0	1	Churachandpur	IgM	july
45	0	1	1	0	0	0	1	Churachandpur	IgM	july
45	0	1	1	0	0	0	1	Churachandpur	IgM	july
45	1	0	1	0	0	0	1	Churachandpur	NS1	july
46	1	0	1	0	0	0	1	Churachandpur	NS1	july
47	0	1	1	0	0	0	1	Churachandpur	IgM	july
50	1	0	1	0	0	0	1	Churachandpur	IgM	july
50	0	1	1	0	0	0	1	Churachandpur	NS1	july
50	1	0	1	0	0	0	1	Churachandpur	NS1	july
53	0	1	1	0	0	0	1	Churachandpur	IgM	july
54	1	0	1	0	0	0	1	Churachandpur	IgM	july
54	1	0	1	0	0	0	1	Churachandpur	NS1	july
55	0	1	1	0	0	0	1	Churachandpur	IgM	july
55	0	1	1	0	0	0	1	Churachandpur	IgM	july
55	0	1	1	0	0	0	1	Churachandpur	NS1	july
56	0	1	1	0	0	0	1	Churachandpur	IgM	july
56	0	1	1	0	0	0	1	Churachandpur	IgM	july
56	1	0	1	0	0	0	1	Churachandpur	IgM	july
59	1	0	1	0	0	0	1	Churachandpur	NS1	july
60	1	0	1	0	0	0	1	Churachandpur	IgM	july
61	1	0	1	0	0	0	1	Churachandpur	IgM	july
61	1	0	1	0	0	0	1	Churachandpur	IgM	july
62	0	1	1	0	0	0	1	Churachandpur	IgM	july
63	0	1	1	0	0	0	1	Churachandpur	IgM	july
65	0	1	1	0	0	0	1	Churachandpur	NS1	july
70	0	1	1	0	0	0	1	Churachandpur	IgM	july
71	0	1	1	0	0	0	1	Churachandpur	IgM	july
74	0	1	1	0	0	0	1	Churachandpur	NS1	july
76	0	1	1	0	0	0	1	Churachandpur	NS1	july
78	0	1	1	0	0	0	1	Churachandpur	IgM	july
93	0	1	1	0	0	0	1	Churachandpur	IgM	july
16	0	1	1	0	0	0	1	imphal east	NS1	Jan
1.4	1	0	1	0	0	0	1	Imphal East	IgM	sep
6	0	1	1	0	0	1	0	Imphal East	IgM	sep
6	1	0	1	0	0	1	0	Imphal East	IgM	sep
9	1	0	0	1	0	1	0	Imphal East	IgM	sep
11	0	1	1	0	0	0	1	Imphal East	IgM	sep
12	0	1	1	0	0	0	1	Imphal East	IgM	sep
13	1	0	1	0	0	0	1	Imphal East	IgM	sep
13	0	1	1	0	0	0	1	Imphal East	IgM	sep
14	1	0	1	0	0	0	1	Imphal East	IgM	sep
16	1	0	1	0	0	0	1	Imphal East	IgM	sep
17	0	1	1	0	0	0	1	Imphal East	IgM	sep
19	1	0	0	1	0	1	0	Imphal East	IgM	sep
19	0	1	1	0	0	0	1	Imphal East	IgM	sep
20	0	1	1	0	0	0	1	Imphal East	IgM	sep
21	1	0	1	0	0	0	1	Imphal East	IgM	sep
21	0	1	1	0	0	0	1	Imphal East	IgM	sep
22	0	1	1	0	1	0	0	Imphal East	IgM	sep
23	0	1	1	0	0	1	0	Imphal East	IgM	sep
24	0	1	1	0	0	0	1	Imphal East	IgM	sep
27	1	0	1	0	0	0	1	Imphal East	IgM	sep
28	0	1	1	0	0	0	1	Imphal East	IgM	sep
28	1	0	1	0	0	0	1	Imphal East	IgM	sep
29	1	0	1	0	0	0	1	Imphal East	IgM	sep
32	0	1	1	0	0	1	0	Imphal East	IgM	sep
32	1	0	1	0	0	0	1	Imphal East	IgM	sep
36	1	0	0	1	0	0	1	Imphal East	IgM	sep
36	0	1	1	0	0	0	1	Imphal East	IgM	sep
42	1	0	1	0	0	0	1	Imphal East	IgM	sep
43	0	1	1	0	0	1	0	Imphal East	IgM	sep
47	0	1	1	0	0	0	1	Imphal East	IgM	sep
50	1	0	1	0	0	0	1	Imphal East	IgM	sep
51	1	0	1	0	0	0	1	Imphal East	IgM	sep
65	0	1	1	0	0	0	1	Imphal East	IgM	sep
7	0	1	1	0	0	0	1	Imphal East	IgM	oct
7	0	1	1	0	0	0	1	Imphal East	IgM	oct
8	1	0	1	0	0	0	1	Imphal East	NS1	oct
12	1	0	1	0	0	0	1	Imphal East	NS1	oct
14	0	1	1	0	0	0	1	Imphal East	IgM	oct
18	0	1	1	0	0	0	1	Imphal East	NS1	oct
19	1	0	1	0	0	1	0	Imphal East	NS1	oct
22	0	1	1	0	0	0	1	Imphal East	IgM	oct
25	0	1	0	1	0	0	1	Imphal East	NS1	oct
26	1	0	1	0	1	0	0	Imphal East	NS1	oct
26	0	1	1	0	0	0	1	Imphal East	NS1	oct
28	1	0	1	0	0	0	1	Imphal East	NS1	oct
29	1	0	0	1	0	1	0	Imphal East	IgM	oct
32	0	1	1	0	0	0	1	Imphal East	IgM	oct
33	0	1	0	1	0	0	1	Imphal East	IgM	oct
35	0	1	1	0	0	0	1	Imphal East	IgM	oct
40	0	1	0	1	0	0	1	Imphal East	IgM	oct
50	0	1	1	0	0	1	0	Imphal East	IgM	oct
65	0	1	1	0	0	1	0	Imphal East	IgM	oct
67	0	1	0	1	0	1	0	Imphal East	NS1	oct
78	1	0	0	1	0	1	0	Imphal East	NS1	oct
13	0	1	0	1	0	1	0	Imphal East	NS1	nov
14	0	1	1	0	0	0	1	Imphal East	NS1	nov
21	0	1	1	0	0	1	0	Imphal East	IgM	nov
21	1	0	0	1	1	0	0	Imphal East	NS1	nov
22	1	0	0	1	0	0	1	Imphal East	NS1	nov
23	0	1	1	0	0	0	1	Imphal East	NS1	nov
25	1	0	1	0	0	1	0	Imphal East	IgM	nov
32	1	0	1	0	0	0	1	Imphal East	NS1	nov
36	1	0	1	0	0	1	0	Imphal East	NS1	nov
40	0	1	0	1	0	1	0	Imphal East	IgM	nov
45	0	1	0	1	0	0	1	Imphal East	IgM	nov
50	1	0	1	0	1	0	0	Imphal East	NS1	nov
56	0	1	1	0	0	1	0	Imphal East	NS1	nov
63	0	1	1	0	0	0	1	Imphal East	NS1	nov
80	1	0	0	1	0	0	1	Imphal East	NS1	nov
17	1	0	1	0	0	1	0	Imphal East	IgM	dec
21	1	0	1	0	0	0	1	Imphal East	IgM	dec
30	1	0	1	0	0	1	0	Imphal East	IgM	dec
38	0	1	0	1	0	1	0	Imphal East	IgM	dec
46	0	1	1	0	1	0	0	Imphal East	IgM	dec
48	0	1	1	0	0	1	0	Imphal East	IgM	dec
55	1	0	1	0	0	0	1	Imphal East	IgM	dec
3	0	1	0	1	1	0	0	Imphal East	IgM	august
3	1	0	1	0	0	1	0	Imphal East	IgM	august
3	0	1	1	0	0	0	1	Imphal East	IgM	august
4	1	0	0	1	1	0	0	Imphal East	IgM	august
4.6	0	1	1	0	0	0	1	Imphal East	IgM	august
6	0	1	1	0	0	0	1	Imphal East	IgM	august
6	1	0	1	0	1	0	0	Imphal East	IgM	august
7	0	1	1	0	0	0	1	Imphal East	IgM	august
8	1	0	0	1	0	1	0	Imphal East	IgM	august
8	1	0	0	1	0	0	1	Imphal East	IgM	august
8	0	1	1	0	1	0	0	Imphal East	IgM	august
9	0	1	1	0	0	0	1	Imphal East	IgM	august
9	1	0	1	0	1	0	0	Imphal East	IgM	august
9	1	0	0	1	0	1	0	Imphal East	IgM	august
10	1	0	1	0	1	0	0	Imphal East	IgM	august
10	0	1	1	0	0	0	1	Imphal East	IgM	august
11	0	1	0	1	0	1	0	Imphal East	IgM	august
11	1	0	1	0	0	0	1	Imphal East	IgM	august
11	0	1	1	0	0	0	1	Imphal East	IgM	august
12	0	1	1	0	1	0	0	Imphal East	IgM	august
13	1	0	1	0	0	0	1	Imphal East	IgM	august
13	0	1	1	0	0	1	0	Imphal East	IgM	august
14	0	1	1	0	1	0	0	Imphal East	IgM	august
14	1	0	1	0	1	0	0	Imphal East	IgM	august
14	0	1	0	1	0	1	0	Imphal East	IgM	august
15	1	0	1	0	0	0	1	Imphal East	IgM	august
15	0	1	0	1	1	0	0	Imphal East	IgM	august
15	0	1	1	0	1	0	0	Imphal East	IgM	august
15	0	1	1	0	0	0	1	Imphal East	IgM	august
15	0	1	1	0	0	0	1	Imphal East	IgM	august
16	0	1	1	0	0	0	1	Imphal East	IgM	august
16	0	1	0	1	0	0	1	Imphal East	IgM	august
17	1	0	0	1	0	0	1	Imphal East	IgM	august
17	1	0	1	0	1	0	0	Imphal East	IgM	august
17	0	1	1	0	0	0	1	Imphal East	IgM	august
18	1	0	1	0	0	0	1	Imphal East	IgM	august
18	0	1	1	0	0	0	1	Imphal East	IgM	august
18	1	0	0	1	1	0	0	Imphal East	IgM	august
18	1	0	1	0	0	1	0	Imphal East	IgM	august
18	0	1	1	0	0	1	0	Imphal East	IgM	august
18	0	1	1	0	1	0	0	Imphal East	IgM	august
18	1	0	1	0	0	1	0	Imphal East	IgM	august
18	1	0	0	1	0	0	1	Imphal East	IgM	august
18	0	1	1	0	0	0	1	Imphal East	IgM	august
19	0	1	1	0	0	0	1	Imphal East	IgM	august
19	0	1	1	0	0	0	1	Imphal East	IgM	august
20	0	1	1	0	0	0	1	Imphal East	IgM	august
20	1	0	0	1	0	0	1	Imphal East	IgM	august
20	0	1	0	1	0	1	0	Imphal East	IgM	august
21	1	0	0	1	0	0	1	Imphal East	IgM	august
21	1	0	1	0	1	0	0	Imphal East	IgM	august
21	0	1	1	0	0	0	1	Imphal East	IgM	august
21	0	1	1	0	0	1	0	Imphal East	IgM	august
21	0	1	1	0	0	0	1	Imphal East	IgM	august
21	1	0	1	0	0	0	1	Imphal East	IgM	august
22	1	0	1	0	0	0	1	Imphal East	IgM	august
22	1	0	1	0	0	0	1	Imphal East	IgM	august
22	1	0	1	0	0	0	1	Imphal East	IgM	august
22	0	1	1	0	0	0	1	Imphal East	IgM	august
22	1	0	1	0	0	0	1	Imphal East	IgM	august
23	1	0	1	0	1	0	0	Imphal East	IgM	august
23	0	1	1	0	0	0	1	Imphal East	IgM	august
23	1	0	0	1	0	0	1	Imphal East	IgM	august
23	1	0	1	0	0	0	1	Imphal East	IgM	august
24	0	1	1	0	0	1	0	Imphal East	IgM	august
24	1	0	1	0	0	1	0	Imphal East	IgM	august
25	1	0	1	0	0	1	0	Imphal East	IgM	august
25	1	0	0	1	0	0	1	Imphal East	IgM	august
25	0	1	1	0	0	0	1	Imphal East	IgM	august
25	1	0	1	0	1	0	0	Imphal East	IgM	august
25	0	1	0	1	0	0	1	Imphal East	IgM	august
26	0	1	1	0	0	1	0	Imphal East	IgM	august
26	1	0	0	1	0	0	1	Imphal East	IgM	august
26	0	1	1	0	1	0	0	Imphal East	IgM	august
26	0	1	1	0	0	1	0	Imphal East	IgM	august
26	0	1	1	0	1	0	0	Imphal East	IgM	august
27	1	0	1	0	0	1	0	Imphal East	IgM	august
27	1	0	1	0	0	1	0	Imphal East	IgM	august
27	1	0	1	0	0	1	0	Imphal East	IgM	august
27	0	1	1	0	1	0	0	Imphal East	IgM	august
27	1	0	1	0	1	0	0	Imphal East	IgM	august
28	0	1	1	0	0	0	1	Imphal East	IgM	august
28	0	1	0	1	0	1	0	Imphal East	IgM	august
28	0	1	0	1	0	1	0	Imphal East	IgM	august
30	1	0	1	0	0	0	1	Imphal East	IgM	august
30	0	1	0	1	0	0	1	Imphal East	IgM	august
30	0	1	1	0	0	0	1	Imphal East	IgM	august
32	1	0	0	1	0	0	1	Imphal East	IgM	august
32	1	0	0	1	0	1	0	Imphal East	IgM	august
33	1	0	0	1	0	0	1	Imphal East	IgM	august
34	1	0	1	0	1	0	0	Imphal East	IgM	august
34	0	1	0	1	0	0	1	Imphal East	IgM	august
35	0	1	0	1	0	0	1	Imphal East	IgM	august
35	1	0	1	0	0	0	1	Imphal East	IgM	august
35	1	0	1	0	1	0	0	Imphal East	IgM	august
35	0	1	0	1	0	0	1	Imphal East	IgM	august
36	0	1	1	0	0	0	1	Imphal East	IgM	august
37	1	0	1	0	0	0	1	Imphal East	IgM	august
37	0	1	0	1	1	0	0	Imphal East	IgM	august
37	0	1	1	0	0	0	1	Imphal East	IgM	august
38	0	1	1	0	0	0	1	Imphal East	IgM	august
39	1	0	0	1	0	1	0	Imphal East	IgM	august
40	1	0	0	1	0	0	1	Imphal East	IgM	august
40	0	1	0	1	0	1	0	Imphal East	IgM	august
41	1	0	1	0	0	1	0	Imphal East	IgM	august
41	1	0	1	0	0	0	1	Imphal East	IgM	august
42	0	1	1	0	0	0	1	Imphal East	IgM	august
42	1	0	1	0	0	0	1	Imphal East	IgM	august
43	1	0	0	1	1	0	0	Imphal East	IgM	august
43	0	1	1	0	0	0	1	Imphal East	IgM	august
43	0	1	1	0	0	0	1	Imphal East	IgM	august
45	1	0	1	0	0	1	0	Imphal East	IgM	august
45	0	1	1	0	0	0	1	Imphal East	IgM	august
46	1	0	1	0	0	0	1	Imphal East	IgM	august
46	0	1	1	0	0	0	1	Imphal East	IgM	august
47	0	1	1	0	0	0	1	Imphal East	IgM	august
48	0	1	1	0	0	0	1	Imphal East	IgM	august
48	0	1	1	0	0	0	1	Imphal East	IgM	august
48	1	0	1	0	0	0	1	Imphal East	IgM	august
48	0	1	1	0	0	0	1	Imphal East	IgM	august
49	0	1	0	1	0	0	1	Imphal East	IgM	august
50	0	1	0	1	0	1	0	Imphal East	IgM	august
50	0	1	1	0	0	0	1	Imphal East	IgM	august
50	0	1	0	1	0	0	1	Imphal East	IgM	august
50	1	0	1	0	0	0	1	Imphal East	IgM	august
51	0	1	0	1	0	0	1	Imphal East	IgM	august
52	1	0	1	0	0	0	1	Imphal East	IgM	august
52	0	1	1	0	0	0	1	Imphal East	IgM	august
53	1	0	0	1	0	1	0	Imphal East	IgM	august
53	0	1	1	0	0	0	1	Imphal East	IgM	august
53	0	1	0	1	0	1	0	Imphal East	IgM	august
54	1	0	1	0	1	0	0	Imphal East	IgM	august
55	1	0	1	0	0	0	1	Imphal East	IgM	august
57	1	0	1	0	0	1	0	Imphal East	IgM	august
58	0	1	1	0	0	0	1	Imphal East	IgM	august
59	1	0	0	1	0	0	1	Imphal East	IgM	august
61	0	1	1	0	0	0	1	Imphal East	IgM	august
65	0	1	1	0	0	0	1	Imphal East	IgM	august
65	0	1	1	0	0	0	1	Imphal East	IgM	august
65	0	1	1	0	0	0	1	Imphal East	IgM	august
66	1	0	1	0	0	0	1	Imphal East	IgM	august
67	0	1	1	0	0	0	1	Imphal East	IgM	august
70	1	0	1	0	0	0	1	Imphal East	IgM	august
75	1	0	1	0	0	1	0	Imphal East	IgM	august
0.8	0	1	1	0	0	0	1	Imphal East	IgM	july
4	1	0	1	0	0	0	1	Imphal East	NS1	july
4	0	1	1	0	0	0	1	Imphal East	NS1	july
9	0	1	1	0	0	0	1	Imphal East	IgM	july
9	0	1	1	0	1	0	0	Imphal East	NS1	july
12	0	1	0	1	1	0	0	Imphal East	IgM	july
15	0	1	1	0	0	0	1	Imphal East	NS1	july
16	0	1	1	0	1	0	0	Imphal East	IgM	july
18	0	1	1	0	1	0	0	Imphal East	IgM	july
23	1	0	1	0	0	1	0	Imphal East	IgM	july
24	0	1	0	1	0	0	1	Imphal East	IgM	july
26	0	1	1	0	0	1	0	imphal east	IgM	july
30	0	1	0	1	1	0	0	Imphal East	IgM	july
32	1	0	1	0	1	0	0	Imphal East	IgM	july
36	1	0	0	1	0	0	1	Imphal East	IgM	july
42	0	1	1	0	0	0	1	Imphal East	NS1	july
50	0	1	1	0	0	1	0	Imphal East	IgM	july
52	0	1	1	0	0	1	0	imphal east	IgM	july
54	1	0	1	0	0	0	1	Imphal East	IgM	july
55	1	0	1	0	0	0	1	Imphal East	NS1	july
57	1	0	1	0	0	1	0	imphal east	IgM	july
57	1	0	1	0	0	1	0	Imphal East	IgM	july
64	0	1	1	0	0	1	0	Imphal East	IgM	july
72	0	1	1	0	0	0	1	imphal east	IgM	july
72	0	1	0	1	0	0	1	Imphal East	NS1	july
75	1	0	1	0	0	0	1	Imphal East	NS1	july
27	0	1	1	0	0	1	0	imphal east	IgM	june
44	0	1	0	1	0	0	1	imphal east	IgM	june
52	0	1	1	0	0	0	1	imphal east	IgM	june
54	0	1	0	1	1	0	0	imphal east	IgM	june
16	1	0	0	1	0	0	1	imphal west	NS1	Jan
18	0	1	0	1	0	0	1	imphal west	NS1	Jan
1.6	0	1	1	0	0	0	1	Imphal West	IgM	sep
6	1	0	0	1	0	0	1	Imphal West	IgM	sep
16	1	0	0	1	0	0	1	Imphal West	IgM	sep
27	1	0	1	0	0	0	1	Imphal West	IgM	sep
29	1	0	0	1	1	0	0	Imphal West	IgM	sep
33	1	0	1	0	0	0	1	Imphal West	IgM	sep
35	0	1	1	0	0	0	1	Imphal West	IgM	sep
39	1	0	1	0	0	0	1	Imphal West	IgM	sep
39	1	0	1	0	0	0	1	Imphal West	IgM	sep
41	0	1	1	0	0	1	0	Imphal West	IgM	sep
46	0	1	1	0	0	0	1	Imphal West	IgM	sep
57	1	0	0	1	0	1	0	Imphal West	IgM	sep
66	1	0	0	1	0	0	1	Imphal West	IgM	sep
75	0	1	0	1	0	0	1	Imphal West	IgM	sep
8	0	1	1	0	0	0	1	Imphal West	NS1	oct
14	1	0	1	0	0	1	0	Imphal West	IgM	oct
16	0	1	0	1	0	0	1	Imphal West	IgM	oct
23	1	0	0	1	0	0	1	Imphal West	IgM	oct
27	1	0	0	1	0	0	1	Imphal West	NS1	oct
29	0	1	0	1	0	0	1	Imphal West	NS1	oct
30	0	1	1	0	1	0	0	Imphal West	NS1	oct
30	0	1	1	0	0	1	0	Imphal West	NS1	oct
31	0	1	0	1	0	0	1	Imphal West	IgM	oct
36	0	1	0	1	1	0	0	Imphal West	IgM	oct
39	1	0	0	1	0	0	1	Imphal West	IgM	oct
44	0	1	0	1	0	1	0	Imphal West	IgM	oct
44	1	0	0	1	1	0	0	Imphal West	NS1	oct
46	0	1	0	1	0	0	1	Imphal West	NS1	oct
57	1	0	0	1	1	0	0	Imphal West	IgM	oct
62	1	0	0	1	0	0	1	Imphal West	IgM	oct
64	0	1	0	1	0	0	1	Imphal West	NS1	oct
66	0	1	0	1	0	0	1	Imphal West	IgM	oct
18	0	1	1	0	0	0	1	Imphal West	NS1	nov
20	1	0	1	0	1	0	0	Imphal West	IgM	nov
23	1	0	0	1	0	1	0	Imphal West	IgM	nov
23	0	1	1	0	0	1	0	Imphal West	NS1	nov
28	1	0	0	1	0	0	1	Imphal West	NS1	nov
42	0	1	0	1	0	1	0	Imphal West	NS1	nov
44	0	1	0	1	0	0	1	Imphal West	NS1	nov
51	0	1	0	1	0	1	0	Imphal West	IgM	nov
53	1	0	0	1	1	0	0	Imphal West	NS1	nov
60	1	0	0	1	0	0	1	Imphal West	NS1	nov
21	0	1	1	0	0	1	0	Imphal West	IgM	dec
25	0	1	1	0	0	0	1	Imphal West	IgM	dec
1	1	0	0	1	0	0	1	Imphal West	IgM	august
5	1	0	0	1	1	0	0	Imphal West	IgM	august
5.4	0	1	0	1	0	1	0	Imphal West	IgM	august
7	0	1	1	0	1	0	0	Imphal West	IgM	august
10	0	1	1	0	1	0	0	Imphal West	IgM	august
13	0	1	1	0	0	1	0	Imphal West	IgM	august
14	1	0	1	0	0	0	1	Imphal West	IgM	august
15	0	1	1	0	0	1	0	Imphal West	IgM	august
15	1	0	1	0	1	0	0	Imphal West	IgM	august
15	0	1	0	1	1	0	0	Imphal West	IgM	august
17	0	1	1	0	0	1	0	Imphal West	IgM	august
17	1	0	1	0	0	0	1	Imphal West	IgM	august
18	1	0	0	1	0	1	0	Imphal West	IgM	august
19	0	1	1	0	0	1	0	Imphal West	IgM	august
20	0	1	1	0	0	0	1	Imphal West	IgM	august
20	1	0	1	0	0	1	0	Imphal West	IgM	august
20	0	1	1	0	0	1	0	Imphal West	IgM	august
21	1	0	1	0	0	1	0	Imphal West	IgM	august
21	1	0	1	0	0	1	0	Imphal West	IgM	august
23	1	0	1	0	0	0	1	Imphal West	IgM	august
23	0	1	1	0	1	0	0	Imphal West	IgM	august
23	1	0	0	1	0	0	1	Imphal West	IgM	august
24	1	0	0	1	0	1	0	Imphal West	IgM	august
25	0	1	1	0	0	1	0	Imphal West	IgM	august
26	1	0	1	0	0	1	0	Imphal West	IgM	august
26	1	0	1	0	0	1	0	Imphal West	IgM	august
27	0	1	0	1	0	0	1	Imphal West	IgM	august
27	1	0	0	1	0	0	1	Imphal West	IgM	august
28	0	1	1	0	0	0	1	Imphal West	IgM	august
29	0	1	0	1	0	1	0	Imphal West	IgM	august
32	0	1	0	1	0	0	1	Imphal West	IgM	august
33	0	1	0	1	0	0	1	Imphal West	IgM	august
33	0	1	0	1	0	0	1	Imphal West	IgM	august
35	0	1	1	0	0	0	1	Imphal West	IgM	august
36	1	0	1	0	0	1	0	Imphal West	IgM	august
36	1	0	0	1	0	1	0	Imphal West	IgM	august
40	1	0	1	0	0	1	0	Imphal West	IgM	august
40	1	0	1	0	0	1	0	Imphal West	IgM	august
40	0	1	1	0	1	0	0	Imphal West	IgM	august
41	0	1	1	0	0	1	0	Imphal West	IgM	august
42	0	1	1	0	0	1	0	Imphal West	IgM	august
42	0	1	1	0	0	0	1	Imphal West	IgM	august
42	1	0	0	1	0	0	1	Imphal West	IgM	august
43	0	1	1	0	0	0	1	Imphal West	IgM	august
44	1	0	1	0	0	1	0	Imphal West	IgM	august
48	1	0	1	0	0	0	1	Imphal West	IgM	august
50	0	1	1	0	0	0	1	Imphal West	IgM	august
50	0	1	0	1	1	0	0	Imphal West	IgM	august
52	1	0	0	1	0	0	1	Imphal West	IgM	august
53	1	0	0	1	1	0	0	Imphal West	IgM	august
53	1	0	0	1	0	0	1	Imphal West	IgM	august
53	1	0	0	1	0	1	0	Imphal West	IgM	august
54	1	0	1	0	1	0	0	Imphal West	IgM	august
54	0	1	1	0	0	0	1	Imphal West	IgM	august
55	1	0	1	0	0	1	0	Imphal West	IgM	august
55	1	0	0	1	1	0	0	Imphal West	IgM	august
57	0	1	0	1	0	1	0	Imphal West	IgM	august
57	0	1	0	1	0	1	0	Imphal West	IgM	august
58	0	1	0	1	0	0	1	Imphal West	IgM	august
59	0	1	1	0	0	1	0	Imphal West	IgM	august
60	1	0	0	1	0	1	0	Imphal West	IgM	august
60	0	1	1	0	0	0	1	Imphal West	IgM	august
60	1	0	1	0	0	0	1	Imphal West	IgM	august
60	0	1	0	1	0	0	1	Imphal West	IgM	august
61	1	0	1	0	0	0	1	Imphal West	IgM	august
61	1	0	1	0	0	0	1	Imphal West	IgM	august
61	0	1	0	1	0	0	1	Imphal West	IgM	august
62	1	0	0	1	0	0	1	Imphal West	IgM	august
62	1	0	0	1	0	0	1	Imphal West	IgM	august
65	0	1	1	0	0	0	1	Imphal West	IgM	august
70	0	1	0	1	1	0	0	Imphal West	IgM	august
80	0	1	0	1	0	0	1	Imphal West	IgM	august
22	1	0	1	0	0	1	0	Imphal West	IgM	july
22	1	0	1	0	1	0	0	Imphal West	IgM	july
25	1	0	1	0	0	0	1	Imphal West	IgM	july
25	0	1	1	0	0	0	1	Imphal West	IgM	july
25	1	0	1	0	1	0	0	Imphal West	NS1	july
26	0	1	1	0	1	0	0	imphal west	IgM	july
27	1	0	0	1	0	0	1	Imphal West	IgM	july
35	0	1	1	0	1	0	0	Imphal West	IgM	july
37	0	1	1	0	1	0	0	Imphal West	IgM	july
56	1	0	0	1	0	0	1	Imphal West	NS1	july
57	1	0	0	1	0	0	1	Imphal West	NS1	july
62	0	1	1	0	0	0	1	Imphal west	IgM	july
62	1	0	1	0	0	0	1	Imphal West	IgM	july
65	1	0	0	1	0	1	0	Imphal West	IgM	july
65	0	1	1	0	1	0	0	Imphal West	NS1	july
71	0	1	1	0	0	0	1	Imphal West	IgM	july
1.5	0	1	1	0	0	0	1	imphal west	IgM	june
37	0	1	0	1	0	1	0	imphal west	IgM	june
50	0	1	1	0	0	1	0	imphal west	IgM	june
7	0	1	1	0	0	1	0	Senapati	IgM	sep
14	1	0	1	0	0	0	1	Senapati	NS1	nov
2	0	1	1	0	0	0	1	Senapati	IgM	sep
3	0	1	1	0	0	0	1	Senapati	IgM	sep
4	0	1	1	0	0	0	1	Senapati	IgM	sep
5	0	1	1	0	1	0	0	Senapati	IgM	sep
7	1	0	1	0	0	1	0	Senapati	IgM	sep
7	1	0	1	0	0	0	1	Senapati	IgM	sep
8	1	0	1	0	0	0	1	Senapati	IgM	sep
8	0	1	1	0	0	0	1	Senapati	IgM	sep
8	1	0	1	0	0	1	0	Senapati	IgM	sep
8	0	1	1	0	0	1	0	Senapati	IgM	sep
9	1	0	1	0	0	0	1	Senapati	IgM	sep
10	1	0	1	0	1	0	0	Senapati	IgM	sep
12	0	1	1	0	0	1	0	Senapati	IgM	sep
12	0	1	1	0	0	0	1	Senapati	IgM	sep
13	1	0	1	0	0	1	0	Senapati	IgM	sep
14	0	1	1	0	0	0	1	Senapati	IgM	sep
14	0	1	1	0	0	1	0	Senapati	IgM	sep
14	0	1	1	0	0	0	1	Senapati	IgM	sep
14	1	0	1	0	1	0	0	Senapati	IgM	sep
15	0	1	1	0	0	1	0	Senapati	IgM	sep
15	0	1	1	0	0	1	0	Senapati	IgM	sep
15	0	1	1	0	0	0	1	Senapati	IgM	sep
15	0	1	1	0	0	0	1	Senapati	IgM	sep
16	1	0	1	0	0	0	1	Senapati	IgM	sep
17	0	1	1	0	1	0	0	Senapati	IgM	sep
22	1	0	1	0	0	0	1	Senapati	IgM	sep
30	0	1	1	0	0	0	1	Senapati	IgM	sep
31	0	1	1	0	0	0	1	Senapati	IgM	sep
32	1	0	1	0	0	0	1	Senapati	IgM	sep
35	0	1	1	0	0	0	1	Senapati	IgM	sep
35	1	0	1	0	0	1	0	Senapati	IgM	sep
36	0	1	1	0	0	0	1	Senapati	IgM	sep
38	0	1	1	0	0	0	1	Senapati	IgM	sep
38	0	1	1	0	0	1	0	Senapati	IgM	sep
39	1	0	1	0	0	0	1	Senapati	IgM	sep
40	1	0	1	0	0	0	1	Senapati	IgM	sep
40	0	1	1	0	0	1	0	Senapati	IgM	sep
45	0	1	1	0	1	0	0	Senapati	IgM	sep
45	0	1	1	0	0	0	1	Senapati	IgM	sep
46	0	1	1	0	0	1	0	Senapati	IgM	sep
46	1	0	1	0	0	1	0	Senapati	IgM	sep
47	0	1	1	0	0	0	1	Senapati	IgM	sep
48	0	1	1	0	0	1	0	Senapati	IgM	sep
48	0	1	1	0	0	0	1	Senapati	IgM	sep
49	0	1	1	0	0	0	1	Senapati	IgM	sep
49	1	0	1	0	0	0	1	Senapati	IgM	sep
50	1	0	1	0	0	0	1	Senapati	IgM	sep
51	0	1	1	0	1	0	0	Senapati	IgM	sep
52	0	1	1	0	0	1	0	Senapati	IgM	sep
53	0	1	1	0	0	0	1	Senapati	IgM	sep
54	1	0	1	0	0	1	0	Senapati	IgM	sep
55	0	1	1	0	0	1	0	Senapati	IgM	sep
55	0	1	1	0	0	0	1	Senapati	IgM	sep
58	1	0	1	0	0	0	1	Senapati	IgM	sep
60	1	0	1	0	0	1	0	Senapati	IgM	sep
64	0	1	1	0	1	0	0	Senapati	IgM	sep
70	1	0	1	0	0	0	1	Senapati	IgM	sep
72	0	1	1	0	0	0	1	Senapati	IgM	sep
83	0	1	1	0	0	0	1	Senapati	IgM	sep
6	0	1	1	0	0	0	1	Senapati	IgM	oct
18	0	1	1	0	0	0	1	Senapati	NS1	oct
22	1	0	1	0	1	0	0	Senapati	NS1	oct
25	0	1	1	0	0	0	1	Senapati	IgM	oct
29	0	1	1	0	0	0	1	Senapati	NS1	oct
32	1	0	1	0	0	0	1	Senapati	IgM	oct
38	0	1	1	0	0	0	1	Senapati	IgM	oct
40	1	0	1	0	0	0	1	Senapati	IgM	oct
40	0	1	1	0	0	0	1	Senapati	NS1	oct
47	1	0	1	0	0	0	1	Senapati	NS1	oct
47	1	0	1	0	0	0	1	Senapati	NS1	oct
55	1	0	1	0	0	0	1	Senapati	NS1	oct
17	0	1	1	0	0	0	1	Senapati	NS1	nov
25	0	1	1	0	0	1	0	Senapati	NS1	nov
35	0	1	1	0	0	0	1	Senapati	IgM	nov
72	1	0	1	0	0	1	0	Senapati	IgM	nov
85	0	1	1	0	0	0	1	Senapati	IgM	nov
20	1	0	1	0	0	0	1	Senapati	IgM	dec
45	1	0	1	0	0	0	1	Senapati	IgM	dec
0.6	1	0	1	0	0	0	1	Senapati	IgM	august
8	0	1	1	0	0	0	1	Senapati	IgM	august
10	0	1	1	0	0	1	0	Senapati	IgM	august
10	0	1	1	0	1	0	0	Senapati	IgM	august
11	0	1	1	0	1	0	0	Senapati	IgM	august
11	1	0	1	0	0	0	1	Senapati	IgM	august
14	1	0	1	0	1	0	0	Senapati	IgM	august
16	0	1	1	0	1	0	0	Senapati	IgM	august
16	0	1	1	0	0	0	1	Senapati	IgM	august
18	1	0	1	0	0	0	1	Senapati	IgM	august
20	0	1	1	0	0	0	1	Senapati	IgM	august
20	1	0	1	0	0	1	0	Senapati	IgM	august
21	0	1	1	0	0	1	0	Senapati	IgM	august
22	1	0	1	0	0	0	1	Senapati	IgM	august
23	1	0	1	0	0	0	1	Senapati	IgM	august
25	0	1	1	0	0	0	1	Senapati	IgM	august
25	1	0	1	0	0	0	1	Senapati	IgM	august
30	1	0	1	0	0	0	1	Senapati	IgM	august
35	0	1	1	0	0	0	1	Senapati	IgM	august
40	0	1	1	0	0	0	1	Senapati	IgM	august
42	0	1	1	0	0	0	1	Senapati	IgM	august
50	1	0	1	0	0	0	1	Senapati	IgM	august
51	0	1	1	0	0	0	1	Senapati	IgM	august
64	0	1	1	0	0	0	1	Senapati	IgM	august
3	1	0	1	0	0	0	1	Senapati	NS1	july
4	1	0	1	0	0	1	0	Senapati	IgM	july
5	0	1	1	0	1	0	0	Senapati	IgM	july
5	1	0	1	0	1	0	0	Senapati	IgM	july
6	1	0	1	0	0	0	1	Senapati	IgM	july
7	0	1	1	0	0	0	1	Senapati	NS1	july
8	1	0	1	0	0	0	1	Senapati	IgM	july
8	1	0	1	0	0	0	1	Senapati	NS1	july
8	1	0	1	0	0	0	1	Senapati	NS1	july
13	0	1	1	0	1	0	0	Senapati	IgM	july
13	0	1	1	0	0	1	0	Senapati	IgM	july
14	1	0	1	0	0	1	0	Senapati	IgM	july
16	0	1	1	0	0	1	0	Senapati	NS1	july
20	0	1	1	0	1	0	0	Senapati	IgM	july
23	0	1	1	0	0	1	0	Senapati	IgM	july
25	1	0	1	0	0	0	1	Senapati	IgM	july
35	1	0	1	0	0	0	1	Senapati	NS1	july
35	1	0	1	0	0	0	1	Senapati	NS1	july
35	1	0	1	0	0	0	1	Senapati	NS1	july
36	0	1	1	0	0	0	1	Senapati	NS1	july
38	1	0	1	0	1	0	0	Senapati	IgM	july
57	1	0	1	0	0	0	1	Senapati	NS1	july
60	0	1	1	0	0	0	1	Senapati	IgM	july
65	1	0	1	0	0	0	1	Senapati	IgM	july
71	0	1	1	0	0	0	1	Senapati	IgM	july
75	0	1	1	0	0	0	1	Senapati	IgM	july
82	1	0	1	0	0	0	1	Senapati	IgM	july
12	0	1	1	0	0	0	1	Tamenglong	IgM	sep
18	0	1	1	0	0	0	1	Tamenglong	IgM	sep
18	0	1	1	0	0	0	1	Tamenglong	IgM	sep
60	1	0	1	0	0	0	1	Tamenglong	IgM	sep
1.1	0	1	1	0	1	0	0	Tamenglong	NS1	oct
58	1	0	1	0	0	0	1	Tamenglong	NS1	oct
11	1	0	1	0	0	0	1	Tamenglong	NS1	nov
7	0	1	1	0	0	0	1	Tamenglong	IgM	august
9	0	1	1	0	0	0	1	Tamenglong	IgM	august
20	0	1	1	0	0	0	1	Tamenglong	IgM	august
27	0	1	1	0	0	1	0	Tamenglong	IgM	august
49	1	0	1	0	1	0	0	Tamenglong	IgM	august
19	0	1	1	0	0	0	1	tamenglong	IgM	june
35	0	1	1	0	1	0	0	thoubal	NS1	oct
58	0	1	1	0	0	0	1	thoubal	IgM	august
34	1	0	1	0	0	1	0	thoubal	IgM	july
55	0	1	1	0	0	0	1	thoubal	NS1	Jan
1.5	0	1	1	0	0	0	1	Thoubal	IgM	sep
17	0	1	1	0	0	0	1	Thoubal	IgM	sep
18	0	1	1	0	0	0	1	Thoubal	IgM	sep
25	1	0	1	0	1	0	0	Thoubal	IgM	sep
28	0	1	1	0	0	0	1	Thoubal	IgM	sep
33	1	0	1	0	0	1	0	Thoubal	IgM	sep
37	1	0	1	0	0	0	1	Thoubal	IgM	sep
37	1	0	1	0	0	0	1	Thoubal	IgM	sep
6	0	1	1	0	1	0	0	Thoubal	NS1	oct
18	0	1	1	0	1	0	0	Thoubal	IgM	oct
21	0	1	1	0	1	0	0	Thoubal	NS1	oct
23	0	1	1	0	0	0	1	Thoubal	IgM	oct
32	1	0	1	0	0	0	1	Thoubal	NS1	oct
45	1	0	1	0	0	1	0	Thoubal	NS1	oct
46	0	1	1	0	0	0	1	Thoubal	IgM	oct
55	0	1	1	0	0	0	1	Thoubal	IgM	oct
55	0	1	1	0	0	0	1	Thoubal	NS1	oct
16	0	1	1	0	0	1	0	Thoubal	IgM	nov
18	0	1	1	0	0	0	1	Thoubal	NS1	nov
30	0	1	1	0	0	0	1	Thoubal	NS1	nov
60	1	0	1	0	0	0	1	Thoubal	IgM	nov
24	0	1	1	0	0	0	1	Thoubal	IgM	dec
29	0	1	1	0	0	0	1	Thoubal	IgM	dec
84	0	1	1	0	0	0	1	Thoubal	IgM	dec
3	1	0	1	0	0	1	0	Thoubal	IgM	august
6	0	1	1	0	1	0	0	Thoubal	IgM	august
12	0	1	1	0	0	1	0	Thoubal	IgM	august
12	1	0	1	0	0	0	1	Thoubal	IgM	august
13	1	0	1	0	0	0	1	Thoubal	IgM	august
13	1	0	1	0	0	0	1	Thoubal	IgM	august
17	0	1	1	0	1	0	0	Thoubal	IgM	august
21	1	0	1	0	1	0	0	Thoubal	IgM	august
22	1	0	1	0	0	0	1	Thoubal	IgM	august
23	0	1	1	0	0	0	1	Thoubal	IgM	august
24	1	0	1	0	0	0	1	Thoubal	IgM	august
24	0	1	1	0	0	0	1	Thoubal	IgM	august
27	0	1	1	0	0	1	0	Thoubal	IgM	august
28	1	0	1	0	0	1	0	Thoubal	IgM	august
30	0	1	1	0	1	0	0	Thoubal	IgM	august
32	0	1	1	0	0	0	1	Thoubal	IgM	august
38	0	1	1	0	0	0	1	Thoubal	IgM	august
38	0	1	1	0	0	0	1	Thoubal	IgM	august
40	0	1	1	0	0	0	1	Thoubal	IgM	august
40	0	1	1	0	0	0	1	Thoubal	IgM	august
40	1	0	1	0	0	0	1	Thoubal	IgM	august
40	0	1	1	0	0	0	1	Thoubal	IgM	august
41	0	1	1	0	0	0	1	Thoubal	IgM	august
42	1	0	1	0	0	1	0	Thoubal	IgM	august
45	0	1	1	0	0	0	1	Thoubal	IgM	august
52	0	1	1	0	0	0	1	Thoubal	IgM	august
54	0	1	1	0	0	0	1	Thoubal	IgM	august
60	1	0	1	0	0	1	0	Thoubal	IgM	august
63	0	1	1	0	0	1	0	Thoubal	IgM	august
75	0	1	1	0	0	0	1	Thoubal	IgM	august
80	0	1	1	0	0	0	1	Thoubal	IgM	august
4.2	1	0	1	0	0	0	1	Thoubal	NS1	july
20	1	0	1	0	0	1	0	Thoubal	IgM	july
21	0	1	1	0	0	1	0	thoubal	IgM	july
29	1	0	1	0	0	0	1	Thoubal	IgM	july
30	0	1	1	0	0	0	1	Thoubal	IgM	july
33	1	0	1	0	0	0	1	Thoubal	IgM	july
53	1	0	1	0	0	0	1	Thoubal	IgM	july
22	0	1	1	0	0	1	0	thoubal	IgM	june
23	0	1	1	0	0	0	1	Ukhrul	IgM	sep
25	0	1	1	0	0	0	1	Ukhrul	IgM	sep
35	1	0	1	0	0	0	1	Ukhrul	IgM	sep
28	0	1	1	0	1	0	0	Ukhrul	IgM	oct
28	1	0	1	0	1	0	0	Ukhrul	NS1	oct
45	0	1	1	0	0	0	1	Ukhrul	NS1	oct
32	0	1	1	0	1	0	0	Ukhrul	NS1	nov
6	0	1	1	0	0	1	0	Ukhrul	IgM	august
16	0	1	1	0	0	1	0	Ukhrul	IgM	august
18	1	0	1	0	0	0	1	Ukhrul	IgM	august
21	1	0	1	0	0	0	1	Ukhrul	IgM	august
30	1	0	1	0	0	0	1	Ukhrul	IgM	august
33	1	0	1	0	1	0	0	Ukhrul	IgM	august
40	1	0	1	0	0	0	1	Ukhrul	IgM	august
48	1	0	1	0	0	1	0	Ukhrul	IgM	august
52	1	0	1	0	0	0	1	Ukhrul	IgM	august
59	1	0	1	0	0	0	1	Ukhrul	IgM	august
67	1	0	1	0	0	0	1	Ukhrul	IgM	august
11	1	0	1	0	0	0	1	Ukhrul	IgM	july
15	0	1	1	0	0	0	1	Ukhrul	IgM	july
19	1	0	1	0	0	1	0	ukhrul	IgM	july
65	1	0	1	0	0	0	1	Ukhrul	NS1	july
89	0	1	1	0	1	0	0	Ukhrul	IgM	july
	557	729	1158	128	205	308	773

## Sheet: 2018
age	female	male	rural	urban	positive	equivocal	negative	District	Test	Month
9	1	0	1	0	0	1	0	Churachandpur	IgM	march
14	1	0	1	0	1	0	0	Churachandpur	IgM	march
30	0	1	1	0	0	0	1	Churachandpur	IgM	march
14	0	1	1	0	0	1	0	Churachandpur	IgM	march
60	0	1	1	0	1	0	0	Imphal East	IgM	march
17	0	1	1	0	0	1	0	Churachandpur	IgM	march
26	0	1	1	0	0	0	1	Imphal West	IgM	march
20	1	0	1	0	0	0	1	Senapati	IgM	march
60	0	1	1	0	0	1	0	Imphal West	IgM	march
70	0	1	1	0	0	0	1	Imphal East	IgM	march
60	0	1	1	0	0	1	0	Imphal West	IgM	march
15	0	1	0	1	0	0	1	Imphal East	IgM	march
70	0	1	1	0	0	0	1	Churachandpur	IgM	march
40	0	1	1	0	0	0	1	Imphal West	IgM	march
70	1	0	1	0	0	0	1	Ukhrul	IgM	march
15	0	1	1	0	0	0	1	Imphal East	IgM	march
26	1	0	1	0	0	0	1	Imphal East	IgM	april
14	0	1	1	0	0	0	1	Imphal East	IgM	april
55	0	1	1	0	0	0	1	Imphal East	IgM	april
12	1	0	1	0	0	0	1	Churachandpur	IgM	april
12	1	0	1	0	0	0	1	Churachandpur	IgM	april
56	0	1	1	0	0	0	1	Churachandpur	IgM	april
21	0	1	1	0	0	0	1	Imphal East	IgM	april
18	0	1	1	0	1	0	0	Imphal West	IgM	april
21	1	0	0	1	0	0	1	Imphal West	IgM	april
36	0	1	1	0	0	0	1	Imphal East	NS1Ag	may
39	0	1	1	0	0	1	0	Imphal East	NS1Ag	may
21	0	1	1	0	0	1	0	Imphal East	NS1Ag	may
27	1	0	1	0	0	1	0	Imphal East	NS1Ag	june
26	0	1	1	0	0	0	1	Churachandpur	NS1Ag	june
24	1	0	1	0	0	0	1	Imphal East	NS1Ag	june
35	1	0	0	1	0	0	1	Imphal East	NS1Ag	june
67	1	0	1	0	0	0	1	Imphal West	NS1Ag	june
18	1	0	1	0	0	0	1	Ukhrul	NS1Ag	june
18	1	0	1	0	0	0	1	Imphal West	NS1Ag	june
32	0	1	1	0	0	1	0	Senapati	IgM	july
2.6	0	1	1	0	0	0	1	Chandel	IgM	july
29	1	0	1	0	0	0	1	Chandel	IgM	july
30	1	0	1	0	0	1	0	Chandel	IgM	july
13	0	1	1	0	0	1	0	Chandel	IgM	july
21	0	1	1	0	0	1	0	Senapati	IgM	july
47	1	0	0	1	0	1	0	Imphal East	IgM	july
44	1	0	0	1	0	0	1	Imphal West	IgM	july
8	1	0	0	1	0	0	1	Imphal West	IgM	july
40	0	1	1	0	0	1	0	Thoubal	IgM	july
20	0	1	1	0	1	0	0	Imphal East	IgM	july
14	1	0	1	0	0	1	0	Imphal East	IgM	july
23	0	1	1	0	0	0	1	Churachandpur	IgM	july
56	1	0	1	0	0	0	1	Bishnupur	IgM	july
19	0	1	1	0	0	0	1	Churachandpur	IgM	july
22	1	0	1	0	0	1	0	Chandel	IgM	july
9	0	1	1	0	0	0	1	Bishnupur	NS1Ag	july
19	0	1	1	0	0	0	1	Bishnupur	NS1Ag	july
10	0	1	0	1	0	1	0	Imphal West	NS1Ag	july
29	1	0	1	0	1	0	0	Imphal East	NS1Ag	july
25	1	0	1	0	0	1	0	Senapati	NS1Ag	july
15	0	1	1	0	0	0	1	Senapati	NS1Ag	july
24	1	0	1	0	0	0	1	Imphal East	NS1Ag	july
55	0	1	0	1	0	0	1	Imphal West	NS1Ag	july
2	0	1	1	0	0	0	1	Tamenglong	NS1Ag	july
25	1	0	1	0	0	0	1	Imphal East	NS1Ag	july
28	0	1	1	0	0	0	1	Imphal East	IgM	august
22	1	0	1	0	0	1	0	Senapati	IgM	august
45	0	1	1	0	1	0	0	Imphal East	IgM	august
25	1	0	1	0	0	1	0	Chandel	IgM	august
14	0	1	1	0	0	1	0	Bishnupur	IgM	august
42	0	1	0	1	0	1	0	Imphal West	IgM	august
52	1	0	1	0	0	0	1	Imphal East	IgM	august
25	1	0	1	0	0	0	1	Chandel	IgM	august
55	0	1	1	0	0	1	0	Bishnupur	IgM	august
29	1	0	0	1	0	1	0	Imphal West	IgM	august
25	1	0	1	0	0	0	1	Imphal West	NS1Ag	august
20	1	0	1	0	1	0	0	Senapati	NS1Ag	august
46	0	1	1	0	0	1	0	Imphal East	NS1Ag	august
28	0	1	1	0	0	0	1	Thoubal	IgM	september
24	1	0	1	0	0	1	0	Senapati	IgM	september
58	0	1	1	0	0	0	1	Imphal East	IgM	september
31	1	0	1	0	0	1	0	Ukhrul	IgM	september
40	0	1	1	0	0	1	0	Imphal East	IgM	september
50	1	0	1	0	0	0	1	Churachandpur	IgM	september
43	0	1	1	0	0	1	0	Thoubal	IgM	september
9	0	1	1	0	0	0	1	Ukhrul	NS1Ag	september
8	0	1	1	0	0	1	0	Chandel	NS1Ag	september
16	0	1	1	0	0	1	0	Imphal East	NS1Ag	september
44	0	1	1	0	0	0	1	Imphal East	NS1Ag	september
42	0	1	1	0	0	0	1	Senapati	NS1Ag	september
9	0	1	1	0	0	0	1	Imphal West	NS1Ag	september
30	1	0	1	0	0	1	0	Imphal East	NS1Ag	september
65	0	1	1	0	0	0	1	Imphal East	NS1Ag	september
28	0	1	1	0	1	0	0	Ukhrul	NS1Ag	september
56	1	0	1	0	0	0	1	Imphal East	IgM	october
19	0	1	1	0	0	0	1	Senapati	IgM	october
26	1	0	1	0	0	0	1	Churachandpur	IgM	october
50	1	0	1	0	0	0	1	Senapati	IgM	october
70	0	1	1	0	0	1	0	Imphal West	IgM	october
22	1	0	1	0	0	0	1	Bishnupur	IgM	october
2.8	0	1	1	0	0	0	1	Imphal East	IgM	october
52	0	1	1	0	0	0	1	Imphal East	IgM	october
25	1	0	1	0	0	0	1	Imphal East	IgM	october
25	0	1	1	0	1	0	0	Thoubal	IgM	october
34	0	1	0	1	0	0	1	Imphal West	IgM	october
65	1	0	1	0	0	1	0	Chandel	IgM	october
24	0	1	1	0	0	0	1	Thoubal	IgM	october
32	0	1	0	1	0	1	0	Imphal West	IgM	october
52	1	0	1	0	0	0	1	Senapati	IgM	october
51	0	1	1	0	0	0	1	Senapati	IgM	october
60	0	1	1	0	0	0	1	Senapati	IgM	october
21	1	0	1	0	0	1	0	Senapati	IgM	october
30	1	0	1	0	0	1	0	Senapati	IgM	october
45	0	1	1	0	0	0	1	Imphal West	IgM	october
13	1	0	1	0	1	0	0	Thoubal	IgM	october
12	1	0	1	0	0	0	1	Thoubal	IgM	october
58	1	0	1	0	0	0	1	Imphal West	IgM	october
19	0	1	1	0	1	0	0	Imphal East	IgM	october
4	0	1	1	0	0	1	0	Imphal East	IgM	october
27	0	1	1	0	0	0	1	Imphal West	IgM	october
30	1	0	1	0	0	0	1	Senapati	IgM	october
42	0	1	1	0	0	0	1	Imphal West	IgM	october
16	0	1	1	0	0	0	1	Imphal West	IgM	november
22	0	1	1	0	0	1	0	Tamenglong	IgM	november
24	0	1	1	0	1	0	0	Imphal West	IgM	november
27	0	1	1	0	0	1	0	Imphal East	IgM	november
41	0	1	0	1	0	0	1	Imphal West	IgM	november
54	1	0	0	1	0	0	1	Imphal West	IgM	november
29	1	0	1	0	0	1	0	Imphal East	IgM	november
67	1	0	1	0	0	1	0	Bishnupur	IgM	november
30	1	0	1	0	0	1	0	Senapati	NS1Ag	december
27	1	0	1	0	0	0	1	Thoubal	NS1Ag	december
32	0	1	1	0	0	1	0	Thoubal	NS1Ag	december
60	0	1	1	0	0	0	1	Thoubal	NS1Ag	december
36	0	1	1	0	1	0	0	Thoubal	NS1Ag	december
25	0	1	1	0	0	0	1	Chandel	IgM	feb
21	1	0	1	0	0	0	1	Imphal East	IgM	feb
18	0	1	1	0	0	1	0	Chandel	IgM	feb
28	0	1	1	0	0	0	1	Imphal West	IgM	feb
18	1	0	1	0	0	0	1	Imphal West	IgM	feb
55	0	1	1	0	0	0	1	Bishnupur	IgM	feb
42	0	1	0	1	0	1	0	Imphal West	IgM	feb
28	1	0	1	0	0	1	0	Senapati	IgM	feb
20	1	0	0	1	0	1	0	Imphal West	IgM	feb
38	0	1	1	0	0	1	0	Senapati	IgM	feb
6	1	0	1	0	0	1	0	Churachandpur	IgM	feb
52	1	0	1	0	0	1	0	Churachandpur	IgM	feb
62	1	0	1	0	0	0	1	Imphal East	IgM	jan
35	0	1	0	1	0	0	1	Imphal East	IgM	jan
65	1	0	1	0	0	0	1	Tamenglong	IgM	jan
34	1	0	1	0	0	0	1	Thoubal	IgM	jan
63	0	1	1	0	1	0	0	Thoubal	IgM	jan
77	0	1	0	1	0	0	1	Imphal East	IgM	jan
48	1	0	1	0	0	0	1	Thoubal	IgM	jan
65	0	1	0	1	0	0	1	Imphal West	IgM	jan
67	1	0	0	1	0	0	1	Imphal West	IgM	jan

## Sheet: tabulation sheet
Dengue analysis 2016
NS1 Ag 2016							Male		Female
Positive	Equivocal	Negative	Total				Rural	Urban	Rural	Urban
35	13	43	91			Positive	10	17	5	21	53
IgM 2016						Equivocal	14	19	8	9	50
18	37	106	161			Negative	40	53	22	34	149
						Total	64	89	35	64	252
									Monthwise Dengue report 2016
age	Details of Positive Female	Details of Positive Male	Details of Equivocal Female	Details of Equivocal Male	Details of Negative Female	Details of Negative Male		Name of the Month	Positive	Equivocal	Negative	Total
upto 10	2	1	3	5	4	8		January	0	0	0	0
11-20	5	6	3	4	9	21		February	0	0	0	0
21-30	4	7	3	8	13	20		March	0	0	0	0
31-40	5	6	5	7	10	23		April	0	0	0	0
41-50	6	4	2	3	5	11		May	0	0	0	0
more than 50	4	3	1	6	15	10		June	0	0	0	0
Total	26	27	17	33	56	93		July	0	0	0	0
District Wise								August	0	0	0	0
District	Positive	Equivocal	Negative	Total				September	2	0	4	6
Bishnupur	0	4	8	12				October	37	31	86	154
Chandel	0	1	1	2				November	12	16	50	78
Churachandpur	1	0	2	3				December	2	3	9	14
Imphal East	6	15	40	61				Total	53	50	149	252
Imphal West	38	20	74	132
Senapati	0	4	5	9
Tamenglong	4	1	2	7
Thoubal	3	4	15	22
Ukhrul	1	0	2	3
	53	49	149	251	1 equivocal from arunchal not included
Dengue analysis 2017
NS1 Ag 2017							Male		Female
							Rural	Urban	Rural	Urban
Positive	Equivocal	Negative	Total			Positive	110	10	74	11	205
24	16	127	167			Equivocal	161	20	110	17	308
IgM 2017						Negative	395	33	308	37	773
181	292	646	1119			Total	666	63	492	65	1286
							Monthwise Dengue report 2017
age	Details of Positive Female	Details of Positive Male	Details of Equivocal Female	Details of Equivocal Male	Details of Negative Female	Details of Negative Male	Total	Name of the Month	Positive	Equivocal	Negative	Total
upto 10	44	3	49	5	115	4	220	January	0	0	4	4
11-20	14	33	23	51	66	93	280	February	0	0	0	0
21-30	28	26	30	45	73	71	273	March	0	0	0	0
31-40	8	14	19	18	59	62	180	April	0	0	0	0
41-50	7	8	9	21	33	48	126	May	1	0	1	2
more than 50	6	14	22	16	66	83	207	June	11	10	12	33
Total	107	98	152	156	412	361	1286	July	79	72	233	384
District Wise								August	77	142	318	537
District	Positive	Equivocal	Negative	Total				September	15	48	120	183
Bishnupur	8	17	28	53				October	16	15	55	86
Chandel	12	23	30	65				November	5	14	20	39
Churachandpur	89	116	341	546				December	1	7	10	18
Imphal East	38	62	151	251				Total	205	308	773	1286
Imphal West	25	42	70	137
Senapati	17	29	85	131
Tamenglong	2	1	10	13
Thoubal	9	14	44	67
Ukhrul	5	4	14	23
	205	308	773	1286
Dengue analysis 2018
NS1 Ag 2017							Male		Female
							Rural	Urban	Rural	Urban
Positive	Equivocal	Negative	Total			Positive	10	0	4	0	14
4	11	22	37			Equivocal	24	4	20	3	51
IgM 2017						Negative	41	7	33	6	87
10	40	65	115			Total	75	11	57	9	152
							Monthwise Dengue report 2018
age	Details of Positive Female	Details of Positive Male	Details of Equivocal Female	Details of Equivocal Male	Details of Negative Female	Details of Negative Male	Total	Name of the Month	Positive	Equivocal	Negative	Total
upto 10	0	0	2	3	1	6	12	January	1	0	8	9
11-20	3	3	2	6	7	8	29	February	0	7	5	12
21-30	1	3	14	4	14	11	47	March	2	5	9	16
31-40	0	1	1	7	2	4	15	April	1	0	8	9
41-50	0	1	1	4	4	5	15	May	0	2	1	3
more than 50	0	2	3	4	11	14	34	June	0	1	6	7
Total	4	10	23	28	39	48	152	July	2	10	14	26
District Wise								August	2	7	4	13
District	Positive	Equivocal	Negative	Total				September	1	7	8	16
Bishnupur	0	3	5	8				October	3	6	19	28
Chandel	0	7	4	11				November	1	4	3	8
Churachandpur	1	5	10	16				December	1	2	2	5
Imphal East	5	12	25	42				Total	14	51	87	152
Imphal West	2	9	22	33
Senapati	1	10	9	20
Tamenglong	0	1	2	3
Thoubal	4	3	7	14
Ukhrul	1	1	3	5
Total	14	51	87	152
Year	Total Sample Tested	Total Seropositive Sample	Positive Males	Positive Females
2016	251	53	27	26
2017	1286	205	120	85
2018	152	14	10	4

## Sheet: analysis
		Total Seropositive Sample	Positive Males	Positive Females
	2016	53	27	26
	2017	205	120	85
	2018	14	10	4
										Name of the Month	2016	2017	2018
										January	0	0	1
										February	0	0	0
										March	0	0	2
										April	0	0	1
										May	0	1	0
										June	0	11	0
										July	0	79	2
										August	0	77	2
										September	2	15	1
										October	37	16	3
										November	12	5	1
										December	2	1	1
										Total	53	205	14
		2016	2017	2018
	Bishnupur	0	8	0
	Chandel	0	12	0
	Churachandpur	1	89	1
	Imphal East	6	38	5
	Imphal West	38	25	2
	Senapati	0	17	1
	Tamenglong	4	2	0
	Thoubal	3	9	4
	Ukhrul	1	5	1
	age	Positive Female 2016	Positive Male 2016	Positive Female 2017	Positive Male 2017	Positive Female 2018	Positive Male 2018
	upto 10	2	1	44	3	0	0
	11-20	5	6	14	33	3	3
	21-30	4	7	28	26	1	3
	31-40	5	6	8	14	0	1
	41-50	6	4	7	8	0	1
	more than 50	4	3	6	14	0	2
	age	Positive 2016	Positive 2017	Positive 2018	Total
	upto 10yrs	3	47	0	50
	11yrs -20yrs	11	27	6	64
	21yrs-30yrs	11	54	4	69
	31yrs-40yrs	11	22	1	34
	41yrs-50yrs	10	15	1	26
	more than 50yrs	7	20	2	29
	Table 4.Age wise sero-positive cases				272
					Total Samples	NS1 Positive	IgM Positive	Total Positive		Row Totals
				2016	251 (270.03) [1.34]	35 (10.07) [61.70]	18 (33.41) [7.11]	53 (43.49) [2.08]		357
				2017	1286 (1282.82) [0.01]	24 (47.85) [11.89]	181 (158.74) [3.12]	205 (206.59) [0.01]		1696
				2018	152 (136.15) [1.85]	4 (5.08) [0.23]	10 (16.85) [2.78]	14 (21.93) [2.86]		180
				Column Totals	1689	63	209	272		2233 (Grand Total)
